# Supplementary material for: Shared decision-making in the ICU from the perspective of physicians, nurses and patients: a qualitative interview study
Source: PubMed Central journal article supplement — BMJ Open. 2021 Aug 11;11(8):e050134. doi: 10.1136/bmjopen-2021-050134 (PMC8359489; doi:10.1136/bmjopen-2021-050134), 2021-08-11
Supplement: bmjopen-2021-050134.draft_revisions.pdf [file bmjopen-2021-050134.draft_revisions.pdf]

# BMJ Open

BMJ Open is committed to open peer review. As part of this commitment we make the peer review history of every article we publish publicly available.

When an article is published we post the peer reviewers' comments and the authors' responses online. We also post the versions of the paper that were used during peer review. These are the versions that the peer review comments apply to.

The versions of the paper that follow are the versions that were submitted during the peer review process. They are not the versions of record or the final published versions. They should not be cited or distributed as the published version of this manuscript.

BMJ Open is an open access journal and the full, final, typeset and author-corrected version of record of the manuscript is available on our site with no access controls, subscription charges or pay-per-view fees (<http://bmjopen.bmj.com>).

If you have any questions on BMJ Open's open peer review process please email [info.bmjopen@bmj.com](mailto:info.bmjopen@bmj.com)

# BMJ Open

## Shared Decision Making in the ICU from the perspective of physicians, nurses and patients: A Qualitative Interview study

|                               |                                                                                                                                                                                         |
|-------------------------------|-----------------------------------------------------------------------------------------------------------------------------------------------------------------------------------------|
| Journal:                      | <i>BMJ Open</i>                                                                                                                                                                         |
| Manuscript ID                 | bmjopen-2021-050134                                                                                                                                                                     |
| Article Type:                 | Original research                                                                                                                                                                       |
| Date Submitted by the Author: | 15-Feb-2021                                                                                                                                                                             |
| Complete List of Authors:     | Wubben, Nina; Radboudumc, Intensive Care van den Boogaard, Mark; Radboudumc, Intensive care van der Hoeven, J.G; Radboudumc, Intensive care Zegers, Marieke; Radboudumc, Intensive Care |
| Keywords:                     | Adult intensive & critical care < INTENSIVE & CRITICAL CARE, QUALITATIVE RESEARCH, MEDICAL ETHICS                                                                                       |
|                               |                                                                                                                                                                                         |

SCHOLARONE™  
Manuscripts

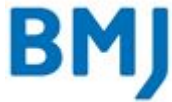

I, the Submitting Author has the right to grant and does grant on behalf of all authors of the Work (as defined in the below author licence), an exclusive licence and/or a non-exclusive licence for contributions from authors who are: i) UK Crown employees; ii) where BMJ has agreed a CC-BY licence shall apply, and/or iii) in accordance with the terms applicable for US Federal Government officers or employees acting as part of their official duties; on a worldwide, perpetual, irrevocable, royalty-free basis to BMJ Publishing Group Ltd ("BMJ") its licensees and where the relevant Journal is co-owned by BMJ to the co-owners of the Journal, to publish the Work in this journal and any other BMJ products and to exploit all rights, as set out in our [licence](#).

The Submitting Author accepts and understands that any supply made under these terms is made by BMJ to the Submitting Author unless you are acting as an employee on behalf of your employer or a postgraduate student of an affiliated institution which is paying any applicable article publishing charge ("APC") for Open Access articles. Where the Submitting Author wishes to make the Work available on an Open Access basis (and intends to pay the relevant APC), the terms of reuse of such Open Access shall be governed by a Creative Commons licence – details of these licences and which [Creative Commons](#) licence will apply to this Work are set out in our licence referred to above.

Other than as permitted in any relevant BMJ Author's Self Archiving Policies, I confirm this Work has not been accepted for publication elsewhere, is not being considered for publication elsewhere and does not duplicate material already published. I confirm all authors consent to publication of this Work and authorise the granting of this licence.

1  
2  
3 1 **Shared Decision Making in the ICU from the perspective of physicians, nurses and patients: A Qualitative**

4  
5 2 **Interview study**

6  
7 3 Nina Wubben, MSc<sup>1</sup>, Mark van den Boogaard, RN, PhD<sup>1</sup>, Johannes G van der Hoeven, MD, PhD<sup>1</sup>, Marieke

8  
9 4 Zegers, PhD<sup>1</sup>

10  
11 5

12  
13 6 1. Radboud university medical center, Radboud Institute for Health Sciences, Department Intensive Care,

14  
15 7 Nijmegen, The Netherlands

16  
17 8

18  
19 9

20  
21 10

22  
23 11

24  
25 12

26  
27 13

28  
29 14

30  
31 15

32  
33 16

34  
35 17

36  
37 18

38  
39 19

40  
41 20

42  
43 21 **Corresponding author: Dr Marieke Zegers**

44  
45 22 Institution where work was performed: the Department of Intensive Care Medicine of the Radboud University

46  
47 23 Medical Center in Nijmegen, the Netherlands.

48  
49 24

50  
51 25 **Author email addresses**

52  
53 26 Nina Wubben [nina.wubben@radboudumc.nl](mailto:nina.wubben@radboudumc.nl)

54  
55 27 Mark van den Boogaard [mark.vandenboogaard@radboudumc.nl](mailto:mark.vandenboogaard@radboudumc.nl)

56  
57 28 Johannes van der Hoeven [hans.vanderhoeven@radboudumc.nl](mailto:hans.vanderhoeven@radboudumc.nl)

58  
59 29 Marieke Zegers [marieke.zegers@radboudumc.nl](mailto:marieke.zegers@radboudumc.nl)

## 30 **Abstract**

31 **OBJECTIVE** To identify views, experiences, and needs for Shared Decision Making (SDM) in the ICU according to  
32 ICU physicians, ICU nurses, and former ICU patients and their close family members.

33 **DESIGN** Qualitative study.

34 **SETTING** Two Dutch tertiary centers.

35 **PARTICIPANTS** 19 interviews were held with 29 participants: seven with ICU physicians from two tertiary centers,  
36 five with ICU nurses from one tertiary center, and nine with former ICU patients, of whom seven brought one or  
37 two of their close family members who had been involved in the ICU stay.

38 **RESULTS** Three themes, encompassing a total of 16 categories, were identified pertaining to struggles of ICU  
39 physicians, needs of former ICU patients and their family members, and the preferred role of ICU nurses. The  
40 main struggles ICU physicians encountered with SDM include uncertainty about long-term health outcomes, time  
41 constraints, feeling pressure because of having final responsibility, and a fear of losing control. Former patients  
42 and family members mainly expressed aspects they missed, such as not feeling included in ICU treatment  
43 decisions and a lack of information about long-term outcomes and recovery. ICU nurses reported mainly  
44 opportunities to strengthen their role in incorporating non-medical information in the ICU decision-making  
45 process and as liaison between physicians, and patients and family.

46 **CONCLUSIONS** Interviewed stakeholders reported struggles, needs and an elucidation of their current and  
47 preferred role in the SDM process in the ICU. This study signals an essential need for more long-term outcome  
48 information, a more informal inclusion of patients and their family members in decision-making processes, and  
49 a more substantial role for ICU nurses to integrate patients' values and needs in the decision-making process.

50 **Keywords:** Shared decision-making, Qualitative study, Interview study, Family, Patient experiences, Critical Care

### 52 **Strengths and limitations of this study**

- 53 • Strengths of our study contain the inclusion of diverse samplings of the three major stakeholder groups  
54 for SDM in the ICU, and interviews were held until data saturation was reached
- 55 • Thorough analysis lead to the identification of three overarching themes and corresponding categories
- 56 • A limitation is that clinician participants were recruited from two tertiary centers
- 57 • Views and articulations of experiences are influenced by culture and should be verified in more  
58 international qualitative studies

## 59 **Background**

60 Shared decision-making (SDM) has been endorsed as the most ethical and appropriate decision making approach  
61 (1, 2). SDM is defined as a cooperative process between clinicians and patients and, often in the Intensive Care  
62 Unit (ICU), their surrogates that enables a way of healthcare decision making that combines both the clinician's  
63 expertise as well as the patient's values and healthcare goals (3, 4).

64 SDM in the ICU is recommended when defining the overall goals of care and when making major treatment  
65 decisions that are preference-sensitive (2). The SDM process should contain as its three main ingredients  
66 information exchange, a deliberation period and making an eventual treatment decision. Research has shown  
67 that interprofessional SDM between physicians and nurses is associated with more accurate prognoses,  
68 reduction of moral distress and a more resilient team (5-9), signaling a need for a defined space for nursing staff  
69 along with physicians and patients and surrogates as the three pillars of ICU decision-making.

70 Though SDM has received a lot of attention by healthcare policy makers as a proponent of a patient's right to  
71 self-determination, there is a lack of evidence for associations between SDM interventions and patient outcomes  
72 (10, 11). Moreover, its implementation in healthcare settings is oftentimes not without difficulty. There is  
73 enormous diversity in care practices influenced by workplace culture and practice style (12, 13). Clinicians also  
74 interpret guidelines differently, and subsequently do not always follow the recommendations when it comes to  
75 information provision (14, 15). In practice, families might not be seen as decision-makers but rather as informants  
76 who should be protected from feeling responsible for choices made for a loved one (3).

77 While patients and families and clinicians do not always agree when it comes to treatment decision making (16),  
78 making family members feel involved in ICU care and treatment decision-making has been shown to reduce fear  
79 and anxiety and prepares them in aiding patients during their recovery process (17-21). SDM also increases the  
80 likelihood of patients forgoing aggressive care (22). SDM interventions are able to improve families' ratings of  
81 quality of communication and shorten the ICU length of stay (23).

82 By elucidating the views of the three main SDM stakeholder groups in current ICU care, it is possible to elaborate  
83 on current ideas about when to incorporate patient and family preferences, when these preferences should be  
84 overridden by clinicians and how clinicians can improve their own interprofessional SDM (5, 24-26). Therefore,  
85 the aim of this study was to explore the views, experiences, and needs for SDM in the ICU according to ICU  
86 physicians, ICU nurses and former ICU patients and their close family members.

87

## 88 **Methods**

### 89 *Study design and setting*

90 This is a qualitative interview study carried out between June 2019 and January 2020 in two tertiary centres. The  
91 Consolidated Criteria for Reporting Qualitative Studies guidelines for the design and analysis of this interview  
92 study were followed (27) (See: Supplementary material 1).

### 94 *Participant sampling*

95 Three groups of participants were interviewed: ICU physicians, ICU nurses and former ICU patients and their  
96 close family members. Physicians and nurses were approached within the professional network of the authors  
97 (MvdB and MZ), and were sampled purposively to ensure a variety in demographic and professional  
98 characteristics. Former ICU patients and their family members were reached through appealing to patient  
99 association volunteers, as well as an advertisement on the ICU patient association website ([www.fcic.nl](http://www.fcic.nl)).

### 101 *Patient and Public Involvement*

102 Former patients and family members were involved in the preparatory phase of this study. Patient organization  
103 board members and the audience members of a patient organization symposium were asked for input into the  
104 topic of SDM in the ICU, which informed the development of the two semi-structured topic guides used in this  
105 study (See: Supplementary material 2). Interview participants responded to an advertisement on the ICU patient  
106 organization website.

### 108 *Data collection*

109 All interviews took place face-to-face in either of the two tertiary centres. Two researchers conducted the first  
110 interview (MZ and NW). All subsequent interviews were conducted by one researcher (NW). Both researchers  
111 are trained to conduct interviews and execute interview analysis. The main interviewer did not have established  
112 relationships with any of the interviewees before study commencement. Interviewees were asked to take part  
113 in an interview about ICU (shared) decision-making. The interviewers had not conducted qualitative work  
114 regarding this topic before.

115 The two topic guides were applied to ICU clinicians and former ICU patients and their family members,  
116 respectively. Topics in both guides included experiences with SDM in the ICU, wishes for its expansion in the ICU

1  
2  
3 117 and changes necessary to achieve this. The translated topic guide can be read in Supplementary materials 3 and  
4  
5 118 4. Data was collected until data saturation was reached. Transcripts were not returned to participants for  
6  
7 119 comment.  
8

9 120

10  
11 121 *Data analysis*

12  
13 122 All audio recordings were transcribed verbatim by an external professional party, and subsequently coded using  
14  
15 123 a grounded theory approach, where categories, themes and codes were derived through the analysis of the data.  
16  
17 124 Coding is an interpretative process in which conceptual labels are assigned to data (28). Two researchers (NW  
18  
19 125 and MZ) coded four interviews independently, before discussing and agreeing upon a coding framework. NW  
20  
21 126 then applied open coding to the remainder of the transcriptions under supervision of MZ. Data analysis was  
22  
23 127 performed using Atlas.ti software.  
24

25 128

26  
27 129 *Ethical approval*

28  
29 130 The study was approved by the research ethics committee of the Radboud University Medical Center, CMO  
30  
31 131 region Arnhem-Nijmegen (number 2020-6306). Participant information and an invitation for the interview were  
32  
33 132 sent in reply to an informal consent to an interview via e-mail. Additional information about participation was  
34  
35 133 given on request either in the e-mail correspondence or before the start of the interview. An informed consent  
36  
37 134 form was signed before the start of the interview.  
38

39 135

40 136

41 137

42 138

43 139

44 140

45 141

46 142

47 143

48 144

49 145



**Results**

A total of 19 interviews were conducted with 29 participants: five ICU nurses, seven ICU physicians, nine former ICU patients and eight family members (Table 1). None of the participants dropped out. The interviews took between 30 and 75 minutes. 50% of the ICU clinicians and 41.2% of the former patients and family members were male. Mean age was 47.7 (SD: 2.6) and 57.4 (SD: 3.5), respectively.

*Table 1. Participant characteristics*

The data analysis resulted in 16 categories from which 3 themes were derived: (I) Struggles of ICU physicians (Table 2), (II) Needs of former patients and family members (Table 3), and (III) the Role of the ICU nurse (Table 4).

**Theme I: Struggles of ICU physicians**

A total of eight categories (Table 2) were identified in this theme: uncertainty and unpredictability of long-term outcomes; responsibility; unwillingness of patients to participate in decision making; physicians prioritize medical facets; trust in patients and families; physicians fear a loss of control; time; and 'acting in a treatment mode' in the case of acute or long-term admissions.

ICU physicians described the uncertainty about long-term health outcomes as one of the main struggles they experienced. They cited literary or anecdotal evidence about unexpected outcomes as a reason for struggling with ICU decision making, such as a patient's satisfaction with life after losing the ability to walk where they expressed only sorrow at first. They cited feeling the weight of this responsibility when dealing with conflicts with nursing staff about continuing or ending treatment. According to the ICU physicians, these conflicts mainly arise over complex, long-stay patients. While they sometimes were uncertain about continuing treatment themselves, earlier experiences with success stories kept them cautious. They expressed a need for more long-term data on survival and quality of life after ICU treatment.

Several barriers to explore the wishes and needs of patients were discussed. ICU physicians mentioned experiences with patients and families who did not want to involve themselves in the medical decision-making process. Also reported by clinicians and former patients and families was a prioritization of medical facets in discussions leading to less attention for 'softer' topics, such as quality of life. Physicians described that these factors often did not come into play unless the patient's chances of recovery become low. Moreover, physicians

1  
2  
3 175 applied their own ideas about what constitutes a good quality of life, while not spending enough time clarifying  
4  
5 176 if a certain patient agreed with their interpretation of a good quality of life. ICU physicians also described  
6  
7 177 doubting wishes expressed by patients and their families, again citing literary evidence and anecdotal  
8  
9 178 experiences with patients changing their mind. They expressed doubts about whether patients and families could  
10  
11 179 actually grasp what certain decision in the ICU could lead to in future. They feared that having families be too  
12  
13 180 involved in ICU decision-making would lead to more medically pointless treatment.  
14  
15 181 Furthermore, the acute setting of the ICU was cited as a struggle in the decision-making process, with the general  
16  
17 182 rush cited as a barrier. A 'treatment mode' was described as a rush-driven attitude where physicians do not take  
18  
19 183 enough time to assess whether treatment is still in line with patients' best interests or wishes.  
20  
21  
22  
23  
24  
25  
26  
27  
28  
29  
30  
31  
32  
33  
34  
35  
36  
37  
38  
39  
40  
41  
42  
43  
44  
45  
46  
47  
48  
49  
50  
51  
52  
53  
54  
55  
56  
57  
58  
59  
60

184 Table 2. Theme 1: Categories pertaining to struggles of ICU physicians

| Category                                                                 | Codes                                                                                                                                                                                                                                                                                                              | Quote                                                                                                                                                                                                                                                                                                                                                                                                                                                                                                                                                                                                                                                                                                                                                        |
|--------------------------------------------------------------------------|--------------------------------------------------------------------------------------------------------------------------------------------------------------------------------------------------------------------------------------------------------------------------------------------------------------------|--------------------------------------------------------------------------------------------------------------------------------------------------------------------------------------------------------------------------------------------------------------------------------------------------------------------------------------------------------------------------------------------------------------------------------------------------------------------------------------------------------------------------------------------------------------------------------------------------------------------------------------------------------------------------------------------------------------------------------------------------------------|
| Uncertainty, interpretability and unpredictability of long-term outcomes | Lack of long-term outcome information; More long-term outcome knowledge causes you to stop treatment sooner; Long-term uncertainty limits conversations about continuing treatment                                                                                                                                 | Physician (P): "Overall I think there is an understandable tendency to postpone [decision making about] problems. [...] Again, the problem is always that uncertainty. The other day we lost a patient after 6 weeks of treatment. [...] On the one hand you can say that we all saw that coming. On the other hand – well, you only know for certain if you've tried it."                                                                                                                                                                                                                                                                                                                                                                                   |
| Responsibility                                                           | ICU physicians have final responsibility; Physician determines treatment plan; Stopping treatment is always an option down the line                                                                                                                                                                                | P: "Look, eventually we are the ones that have to bring the message to the family when we stop treatment ... and that is our responsibility. So for a nurse it is easier to question whether we should continue, whereas we really need to do so based on good and substantial arguments."                                                                                                                                                                                                                                                                                                                                                                                                                                                                   |
| Unwillingness of patients to participate in decision making              | Certain types of patients don't want to be involved in decision making; Older patients; Family members hold back                                                                                                                                                                                                   | P: "[...]especially older people say: no, you've studied for this – I don't know, you tell me. They just put everything back in your hands. You want to have those people decide for themselves but they're not going to."                                                                                                                                                                                                                                                                                                                                                                                                                                                                                                                                   |
| Physicians prioritize medical facets                                     | Conversations about continuing treatment are difficult when patients are doing badly; Quality of life is a 'soft' topic; Medical point of view takes precedence; Quality of life not a standard part of multidisciplinary discussions; ICU patients' needs center around communication and (non-medical) treatment | P: "Look, in the end we all prefer talking about the fluid balance and CRP levels. That's the truth. So [talking about quality of life] is 'soft' drivel to many people."<br>P: "Of course everyone will agree that [a patient's biography] is an important topic, but it will often end up last in discussions. I think that the medical side, prognosis, chance of improvement, what are possibilities or alternatives, etc. is always first. These things don't come up until you start wondering if [continuing treatment is still proportional]."<br>Former patients and their families (PF): "[patient with very long admission] I've often called it prison. Everything was decided for me. The theme of my illness was losing all sense of control." |
| Trust in patients and families                                           | Physicians use own interpretation of what constitutes good quality of life; Physicians do not always trust that patients and families know what they want; Physicians know patients can change their minds; Well-informed patients make different choices                                                          | P: "What I used to see, and still see a bit – is that we physicians have our own opinions about what constitutes a good quality of life – in other words, what a good outcome looks like. And we do not look at the patient well enough."<br>P: "Things like what would they have wanted, right – [...] we know that it's proven in literature that people who did not want a certain situation, that when it actually happened to them, they were happy with that outcome [...]. So that information – 'he would never have wanted to end                                                                                                                                                                                                                   |

|                                                                                                    |                                                                                                                                                                |                                                                                                                                                                                                                                                                                                                                                                                                                                                                                                                                                                                                                                                                                                                                                                                                           |
|----------------------------------------------------------------------------------------------------|----------------------------------------------------------------------------------------------------------------------------------------------------------------|-----------------------------------------------------------------------------------------------------------------------------------------------------------------------------------------------------------------------------------------------------------------------------------------------------------------------------------------------------------------------------------------------------------------------------------------------------------------------------------------------------------------------------------------------------------------------------------------------------------------------------------------------------------------------------------------------------------------------------------------------------------------------------------------------------------|
|                                                                                                    |                                                                                                                                                                | up in a wheelchair' or 'he would never have wanted to be dependent', when it happens to you, we are apparently flexible enough in our behaviors and emotions, that we eventually can be very happy, and very happy to be alive. So that information has limited value".                                                                                                                                                                                                                                                                                                                                                                                                                                                                                                                                   |
| Physicians fear a loss of control                                                                  | Family or patient wants to continue treatment disproportionately; ICU physicians have final responsibility                                                     | P: "[On reasons other physicians might not ask a patient or family's wishes] Not wanting to be surprised with things you might not be able to do. That you're scared of promising something you can't fulfill. It's weird to then not ask the question, but that is a way of doing things. Or fearing totally irrational wishes from people."                                                                                                                                                                                                                                                                                                                                                                                                                                                             |
| Time                                                                                               | Admission rush or other time constraints limit conversations about treatment wishes                                                                            | P: "The limits are mostly put on by time and space. Sometimes you have a really busy day so you don't have time for it. Then you need to cut back a little on those conversations, because there isn't any time."                                                                                                                                                                                                                                                                                                                                                                                                                                                                                                                                                                                         |
| 'Treatment mode' in acute settings                                                                 | Treatment mode limits conversations about treatment wishes; Stopping treatment is always an option down the line; To admit at all or to discontinue treatment; | P: "At the same time it's easier for me to intubate, [...] to start renal replacement therapy – far easier than not starting treatment. So I think that's an important point. [...] Sometimes we use the multidisciplinary discussion to say to each other: are we really still on the right track? [...] And then you sometimes get one-liners like: 'You can always stop [treatment], the patient can always say that they don't want it like this [at a later stage]."<br>P: "I'm convinced that people have an interest in being told there is a chance of an unfortunate outcome. [...] I think it's also to do with that many physicians, due to their nature, are in 'treatment mode', and principally still want to treat. Stopping treatment is not a standard reflex of the average physician." |
| Abbreviations: N = ICU Nurse, P = ICU physician, PF = Former ICU patients and their family members |                                                                                                                                                                |                                                                                                                                                                                                                                                                                                                                                                                                                                                                                                                                                                                                                                                                                                                                                                                                           |

185

1  
2  
3 186 **Theme II: Needs of former patients and family members**

4  
5 187 Four categories (Table 3) were identified within this theme, including: a holistic approach; feeling included in the  
6  
7 188 medical process and knowing what's coming; information about long-term outcomes; and communication  
8  
9 189 between medical staff and patients and families.

10  
11 190 Former ICU patients and their families described an overwhelming satisfaction with medical care. Their needs  
12  
13 191 centred around how they remembered being treated in a broader sense. They reported sometimes struggling  
14  
15 192 with lingering feelings and memories. Some recalled feeling seen as a condition rather than a human being, which  
16  
17 193 caused them to feel helpless during their stay.

18  
19 194 While some had no additional needs with regards to their part in the ICU decision-making process, others' needs  
20  
21 195 focused on two areas: being made to feel included in everyday decisions, and being better prepared for their  
22  
23 196 recovery post-ICU.

24  
25 197 Former patients also reported a sense of lack of control about their ICU care. They expressed that this might have  
26  
27 198 been different if they had felt more included in the decision-making process by being explained why things were  
28  
29 199 being done to them. Especially during longer stays they cited a frustration with their sense of lack of control  
30  
31 200 regarding their schedule in the ICU that they did not experience once leaving the ICU. Some felt that more  
32  
33 201 integration between the medical and 'human' side was needed. For example, being explained exactly why  
34  
35 202 inserting a catheter was necessary instead of feeling like the insertion was a foregone conclusion. They cited that  
36  
37 203 *feeling* heard and included was the most important factor, rather than having an equal hand in every and all  
38  
39 204 decisions.

40  
41 205 Moreover, they described that the long road to recovery post-ICU was sometimes unexpected and they  
42  
43 206 expressed a need for more information. This did not only pertain to physical recovery, but to mental health and  
44  
45 207 emotional recovery and issues regarding returning to the workforce as well. They described different levels of  
46  
47 208 received aftercare post-ICU, and the difference it had made to their recovery.  
48  
49  
50  
51  
52  
53  
54  
55  
56  
57  
58  
59  
60

209 *Table 3. Theme II: Categories pertaining to the needs of former ICU patients and their close family members*

| Categories                                                       | Codes                                                                                                                                                                                            | Quotes                                                                                                                                                                                                                                                                                                                                                                                                                                                                                                                                                                                               |
|------------------------------------------------------------------|--------------------------------------------------------------------------------------------------------------------------------------------------------------------------------------------------|------------------------------------------------------------------------------------------------------------------------------------------------------------------------------------------------------------------------------------------------------------------------------------------------------------------------------------------------------------------------------------------------------------------------------------------------------------------------------------------------------------------------------------------------------------------------------------------------------|
| A holistic approach                                              | ICU patients' needs center around communication and (non-medical) treatment; Little attention for the human behind the condition; Physician coming to sit next to you to ask you how you are     | PF: "Treating me as a human being instead of a patient with some mystery illness – yes, I would have appreciated that very much, especially now looking back."<br>PF: "Being nicer to you. I've heard it from many patients. There are very little things someone does when maybe having a bad day at work, but for a patient in such a situation – that's not normal for you. So those are things that you remember months later, while the nurse probably doesn't think about it at all."                                                                                                          |
| Feeling included in the process and knowing what's coming        | Communication needs: knowing what's coming; Conversations about shared decision making are physician-driven; Patients and families lack a feeling of control                                     | PF: "Well, it all happens to you. I think that happens a lot in the ICU, because most of the time things aren't planned, so things happen. [...] But if you wanted to optimize it, in my experience, you can tell people: what are you doing, why are you doing it. Even if people are half-conscious, you don't know what they will remember. I think they are very much in a 'state of doing'."                                                                                                                                                                                                    |
| Communication between medical staff and patients and families    | ICU patients' needs center around communication and (non-medical) treatment; Patients and families lack a feeling of control; No attention for the family                                        | PF: "I've noticed that the physicians mainly focus on getting better, while you're still in a completely different phase. Coordinating those views, I think that's very healthy. The medical part – they have to decide and give you choices and options, but the human part you have to coordinate together because otherwise I won't understand your decision at all. [...] And at some point you think: well, whatever, do it, but if you don't agree mentally and you feel so weak – I don't think that's good for your physical recovery."                                                      |
| Information about long-term outcomes                             | Needs for long-term information; Information regarding recovery; Answers to standing questions; Well informed patients decide differently; Better information provision leads to better outcomes | PF: "My feeling about the ICU is – the onus is on quick action, and survival. But then there is a long road afterwards and I think there should be more attention to that. Like a conversation with the partner, or whoever, someone close to the patient to say: what is important for the patient down the line?"<br>PF: "Now I've noticed that the better the aftercare, the better your recovery."<br>PF: "Afterwards it's worse, it seems like. Then it really gets through to you how bad it could have been – and then immediately how good it has been that you've managed to prevent that." |
| Abbreviations: PF = Former ICU patients and their family members |                                                                                                                                                                                                  |                                                                                                                                                                                                                                                                                                                                                                                                                                                                                                                                                                                                      |

210

211

1  
2  
3 213 ***Theme III: The Role of ICU nurses***  
4

5 214 Four categories were identified within this theme: the role of the ICU nurse being a liaison and translator  
6  
7 215 between the physician and the patient and their family; questioning ICU physician's decisions to continue  
8  
9 216 treatment; difficulties in communication between physicians and nurses; and offering non-medical information  
10  
11 217 to complement ICU decision-making.

12  
13 218 Within ICU decision-making, ICU nurses were generally focused on their communication with ICU physicians.  
14  
15 219 They described functioning as a liaison between ICU physicians and patients and their families, mainly due to  
16  
17 220 their continuous presence at the bedside. Both physicians and nurses described the role of the nurse as an  
18  
19 221 advocate for the social context and needs of patients and their families to physicians, as well as a translator of  
20  
21 222 the sometimes difficult medical 'speak' of physicians. Some nurses reported that they used this role to  
22  
23 223 compensate for the variety in physician communication skills with patients and families.

24  
25 224 Nurses reported being able to provide context for physicians to incorporate in medical decision-making by giving  
26  
27 225 their insights in the patient and family situation. They generally felt listened to, even if their more holistic points  
28  
29 226 of view were not always incorporated in the eventual medical decision. However, in non-complex, everyday  
30  
31 227 cases, they were generally not troubled by this. They noted difficulties in communication between their two  
32  
33 228 professions depending wholly on the various types of physician and nurse. Assertive nurses made sure their  
34  
35 229 voices were heard, but acknowledged that not all of their colleagues have this capability.

36  
37 230 Conflicts arose in situations of complex patient cases being in the ICU for a prolonged period of time. These  
38  
39 231 struggles centred around continuing or ending treatment, with physicians oftentimes advocating for the former,  
40  
41 232 while nurses want the latter. They felt this was mostly due to being more affected by complex, poignant cases,  
42  
43 233 due to their continuous presence at the bedside. Within this context they reported feeling not being taken  
44  
45 234 seriously and feeling blindsided by decisions being made in multidisciplinary meetings dominated by physicians.  
46  
47 235 They felt frustrated with the returning nature of this type of conflict. They urged bridging the gap between  
48  
49 236 physicians and nurses through team-building, moral deliberation and sharing vulnerabilities about treatment  
50  
51 237 doubts.

52  
53  
54 238  
55  
56 239

240 Table 4. Theme III: Categories pertaining to the role of ICU nurses

| Categories                                                       | Codes                                                                                                                                                                                                                                                         | Quotes                                                                                                                                                                                                                                                                                                                                                                                                                                                                                                                                                                                                                                                                                                                                                                                                                                                                                                                        |
|------------------------------------------------------------------|---------------------------------------------------------------------------------------------------------------------------------------------------------------------------------------------------------------------------------------------------------------|-------------------------------------------------------------------------------------------------------------------------------------------------------------------------------------------------------------------------------------------------------------------------------------------------------------------------------------------------------------------------------------------------------------------------------------------------------------------------------------------------------------------------------------------------------------------------------------------------------------------------------------------------------------------------------------------------------------------------------------------------------------------------------------------------------------------------------------------------------------------------------------------------------------------------------|
| Liaison and translator between physician, and patient and family | Nurse is eyes and ears of the physician; Nurse translates medical world for patient; Nurse makes sure information is clear after a family conference; Sharing vulnerabilities can improve communication between clinicians                                    | ICU Nurse (N): "Then after the family conference, you let it sink in, and you start repeating it and repeating it. And you try to use the same words as the physician – because I've noticed families say: I think it's so difficult, one says this and the others says this – but that's because [families] don't understand."<br>P: "What kind of support we need, how the family is doing, how the patient is doing, sleeping, pain – there are a lot of things they have a lot of insight about, yes."<br>P: "Where I see the nurse is [...] as a translator of what the patient was like at home, who are they, what type of person were they, what is their social safety net like [...]. That information is very valuable [...]. So I think that their added value is in the clarification of the social context."<br>N: "That is kind of the role we take on: [translating the family's wishes for the physicians.]" |
| Incorporating non-medical information in ICU decision-making     | Nurse provides social and empathetic point of view; ICU nurse is at bedside for 24 hours a day; Talking about it when something doesn't feel right; Nurse participation in conversation depends on how assertive they are                                     | N: "Yes – [nurses] think it's important to be of value in decision moments. Continuing or not, you know. Of course you need to do so based on medical information, but also based on the holistic view, and I think we should play a larger part in that, because we also know the family really well."<br>N: "I think generally it is a very medically-focused decision-making process in which the nurse is heard and listened to [...] but I don't think we have that big of a share in the eventual decision."                                                                                                                                                                                                                                                                                                                                                                                                            |
| Difficulties in communication between physicians and nurses      | Cooperation with nurses;<br>Discrepancy of opinion between ICU physicians and nurses regarding end-of-life care for complicated cases;<br>Nurse doesn't feel welcome in multidisciplinary meeting;<br>ICU nurse feels like they are not being taken seriously | P: "There are nurses that are well spoken and they'll tell you their stuff. They are there, but they are a minority. Plus, they won't always say it to everyone, because they know some [physicians] won't listen."<br>N: "Then the next day there was a new [intensivist] that didn't know the patient, but I had been at the bedside the entire day, so I told them [what the previous intensivist and I had decided]. [Then they said:] 'Well, that wasn't communicated with me, I don't agree with you, we won't do it'. So then you're not heard."                                                                                                                                                                                                                                                                                                                                                                       |



1  
2  
3  
4  
5  
6  
7  
8  
9  
10  
11  
12  
13  
14  
15  
16  
17  
18  
19  
20  
21  
22  
23  
24  
25  
26  
27  
28  
29  
30  
31  
32  
33  
34  
35  
36  
37  
38  
39  
40  
41  
42  
43  
44  
45  
46

|                                                        |                                                                                                                                                                                                   |                                                                                                                                                                                                                                                                                                                                                                                                                                                                      |
|--------------------------------------------------------|---------------------------------------------------------------------------------------------------------------------------------------------------------------------------------------------------|----------------------------------------------------------------------------------------------------------------------------------------------------------------------------------------------------------------------------------------------------------------------------------------------------------------------------------------------------------------------------------------------------------------------------------------------------------------------|
| Questioning physician’s decision to continue treatment | Conflict arises around complex patients who are at the ICU for a long time; Medical point-of-view takes precedence; Whether nurse’s point-of-view is heard depends on which physician is on shift | <p>N: “We often feel that when the patient is there for a very long time, and we see them deteriorating – the physicians often think: we can try this and we should approach them, maybe they know something – and then we think: should we do all of this?”</p> <p>N: “I think: there are limits. Sometimes it’s enough. If you’ve done everything – you shouldn’t stop based on emotions [...] but other times I think: [recovery]’s just not going to happen.</p> |
| Abbreviations: N = ICU Nurse, P = ICU physician        |                                                                                                                                                                                                   |                                                                                                                                                                                                                                                                                                                                                                                                                                                                      |

For peer review only

1  
2  
3 242 Overall, clinicians were focused on the struggles with implementing SDM in critical care practice. The cited the  
4  
5 243 practical difficulties surrounding end-of-life decision making, the formal necessities for SDM and their role in it.  
6  
7 244 Patients and their family members offered a different perspective on incorporating SDM. Their unmet needs  
8  
9 245 were mainly focused on wanting a more holistic approach characterized by an open style of communication  
10  
11 246 wherein they continuously feel part of the decision-making process, albeit not at the helm. Nurses spoke of their  
12  
13 247 current role in the SDM process, and where they felt they could contribute more but where inconsistently  
14  
15 248 listened to (Figure 1).  
16

17 249

18  
19  
20 *Figure 1. ICU physicians mainly spoke of struggles with implementing SDM in the ICU, while patients and*  
21 *families elaborated on their needs, and ICU nurses talked about how their current role in the ICU decision-*  
22 *making process could be improved.*  
23

24 250

25 251

26 252

27 253

28 254

29 255

30 256

31 257

32 258

33 259

34 260

35 261

36 262

37 263

38 264

39 265

40 266

41 267

42 268

**Discussion**

1  
2  
3 269 This qualitative interview study explored the views, experiences, and needs for SDM in the ICU experienced by  
4  
5 270 ICU physicians, nurses and former patients and their family members. Interviewees reported struggles, needs  
6  
7 271 and an elucidation of their current and preferred role in the SDM process in the ICU.  
8  
9 272 ICU physicians mainly associated SDM with struggles, such as the uncertainty of the future disease course and  
10  
11 273 feeling pressure because of having final responsibility. They also reported several barriers that prevented them  
12  
13 274 from open communication about wishes of patients or proxies, such as a fear of losing control of the situation.  
14  
15 275 ICU patients and their families reported unmet needs with regards to communication and general (non-medical)  
16  
17 276 treatment, wanting to continuously feel included in the ICU decision-making process, not just during formal  
18  
19 277 meetings. ICU nurses drew a clear picture of their role in the SDM process as a liaison between the physician and  
20  
21 278 patient. They translate medical jargon for patients, and advocate for patients' needs and wishes in the decision-  
22  
23 279 making process. They reported communication struggles with physicians that limited a more balanced decision-  
24  
25 280 making process, in which nurses provide physicians with more information about the wishes and needs of  
26  
27 281 patients.  
28  
29 282 Earlier literature into the subject shows a focus on decisions pertaining to end-of-life (15, 29-31). This decision is  
30  
31 283 sometimes viewed as one of the main and most difficult decisions to be made in the ICU, so much so that clinician  
32  
33 284 interviewees oftentimes presumed it to be the natural focus point of the interview. Consistently, there was a  
34  
35 285 variety of interpretations regarding what SDM in the ICU looked like. This signals a possible need for training and  
36  
37 286 role models (15, 32, 33) to improve both clinician-patient and interprofessional understanding and execution of  
38  
39 287 SDM.  
40  
41 288 In earlier literature it is reported that a significant part of patients and family members might not be willing to  
42  
43 289 participate in the decision-making process (34). This was reflected in our sample too: not all interviewees had  
44  
45 290 additional needs with regards to decision-making. The needs that were reported here bear some similarities to  
46  
47 291 literature into patient palliative care preferences: mainly, value-focused care aimed at preserving the patient's  
48  
49 292 sense of personhood (35). An ICU-based study aimed at improving communication between families and  
50  
51 293 physicians has noted the importance of family members feeling involved in informal physician interactions as  
52  
53 294 well as larger formal ones to establish their role in the decision-making process and improve family  
54  
55 295 empowerment (36). Patient and family empowerment through information provision and awareness of the  
56  
57 296 presence of choices are necessary ingredients to improve patient involvement in ICU decision-making (37).  
58  
59  
60

1  
2  
3 297 The findings in this study pertaining to the struggles of physicians confirm findings in earlier studies, especially  
4  
5 298 the difficulties surrounding end-of-life decision-making and the resulting communication struggles between  
6  
7 299 physicians and nurses (14, 29, 38). Clinicians appeared hesitant to surrender control of the decision-making  
8  
9 300 process due to their past experiences, as well a lack of trust in the understanding of the situation exhibited by  
10  
11 301 the patient and family members. The unavailability of long-term outcome information around survival and  
12  
13 302 quality of life was important to their hesitance in starting conversations around decision-making. Though long-  
14  
15 303 term outcome data collection in the ICU has its challenges (39), there is an increase in big data initiatives to tackle  
16  
17 304 the current gaps in knowledge (40).

18  
19 305 Communication struggles reported mainly by the ICU nurses pertaining to decisions to limit treatment have been  
20  
21 306 documented before and appear widespread (41, 42). Nurses have been described to detect any type of ICU  
22  
23 307 conflict quicker than physicians (43), and these conflicts can lead to augmented levels of stress in nurses (44).  
24  
25 308 This again signals an urgent need for training to improve interprofessional collaboration and communication,  
26  
27 309 perhaps through more frequent moral deliberation meetings (45). As was reported in previous literature, the  
28  
29 310 levels of their involvement in ICU decision-making processes were variable and depended on assertiveness and  
30  
31 311 the type of physician on call (46). It therefore follows that the information about patient context and background  
32  
33 312 cannot always be sufficiently imparted, though research has shown that nurse involvement in ICU decision-  
34  
35 313 making improves both patients' and nurses' satisfaction-of-care (47). To equalize the instances of nurse  
36  
37 314 involvement and provide nurses with a more consistent opportunity to provide their knowledge, it may be  
38  
39 315 beneficial to increase and better define their role during decision-making moments, such as during patient  
40  
41 316 handovers, bedside rounds and multidisciplinary meetings.

42  
43 317 To ensure a more complete understanding of the complexities of an ICU stay, general practitioners could play a  
44  
45 318 part in information provision to patients and family members in an environment not yet defined by quick action  
46  
47 319 (48), while also being able to provide ICU clinicians with context information about the patient. With the large  
48  
49 320 variety in staff attitude to SDM in the ICU, and the interventions surrounding education, prioritization and  
50  
51 321 resource (re)allocation needed to further implement SDM, the organization at large should play a role in  
52  
53 322 guideline development and setting a work standard involving SDM (49, 50).

54  
55  
56 323

57  
58 324

1  
2  
3 325 This study offers further elucidation of reasons for the variable levels of uptake of SDM in the ICU. It is a further  
4  
5 326 step towards implementation, paving the way towards a more satisfactory exchange of values between all three  
6  
7 327 stakeholder groups to make preference-based decisions. A strength of this study is the inclusion of all three major  
8  
9 328 stakeholder groups.

10  
11 329 Our study has several limitations. Though our sample size may be regarded as small, the number of interviews in  
12  
13 330 this study is more than the number suggested by Guest et al (51). The findings of qualitative research need to be  
14  
15 331 verified for frequency of occurrence in larger samples through questionnaire research. Moreover, our focus on  
16  
17 332 two tertiary centres as the main source of interviewed clinicians, may have skewed the results. However, our  
18  
19 333 findings are in accordance with literature as well as with the preparatory data collected from ICU clinicians and  
20  
21 334 former patients and family members at the national patient organization symposium (Supplementary material  
22  
23 335 2). Lastly, views and articulations of experiences are influenced by culture. More studies concerning all three  
24  
25 336 main stakeholder groups from different cultures can be a way of elucidating whether the concepts described  
26  
27 337 here are universal or if there are more or different themes.

28  
29 338  
30  
31 339 Though ascertainment of the frequency of these findings might be necessary, the similarities of these results to  
32  
33 340 the literature and preliminary data collection embolden us to say that to further improve SDM implementation  
34  
35 341 there is a need for:

- 36  
37 342
- 38 • A more continuous role of patients and family members in ICU decision-making, as individually desired  
39 and ascertained
  - 40 343
  - 41 344 • Long-term, specific outcome information about survival and quality of life to support SDM discussions
  - 42 345 • A more substantial role for the ICU nurse to ensure their imparting of knowledge about patient context  
43 and background during handover meetings, bedside rounds and the multidisciplinary meetings
  - 44 346
  - 45 347 • Interventions to improve communication between the three stakeholder groups, such as moral  
46 deliberation, interprofessional collaboration, and the involvement of the general practitioner
  - 47 348
  - 48 349
  - 49 350
  - 50 351
  - 51 352
  - 52 353

1  
2  
3 354 **Conclusions**  
4

5 355 In the ICU, necessary steps should be taken to implement SDM in a way that satisfies physicians, nurses and  
6  
7 356 patients and their family members. This study gives several recommendations to ensure that all three  
8  
9 357 stakeholder groups can fulfill their role in the SDM process. All in all, there is an essential need for more long-  
10  
11 358 term health outcomes, a more informal inclusion of patients and their family members role in decision-making  
12  
13 359 processes, and a more substantial role for the ICU nurse to systematically integrate patients' values and needs  
14  
15 360 in the decision-making process. There is a need for interventions that tackle the communication struggles  
16  
17 361 between the three stakeholder groups.  
18

19 362

20  
21 363

22  
23 364

24  
25 365

26  
27 366

28  
29 367

30  
31 368

32  
33 369

34  
35 370

36  
37 371

38  
39 372

40  
41 373

42  
43 374

44  
45 375

46  
47 376

48  
49 377

50  
51 378

52  
53 379

54  
55 380

56  
57 381

58  
59 382  
60

1  
2  
3 383 **Declarations**

4  
5 384 *Competing interests*

6  
7 385 The authors declare that they have no competing interests.

8  
9 386 *Funding*

10  
11 387 This work was supported by Zorginstituut Nederland to last author Dr. Marieke Zegers (2018026879).

12  
13 388 Zorginstituut Nederland was not involved in the design of the study, nor with the data collection, analysis,  
14  
15 389 interpretation or writing of the manuscript.

16  
17 390 *Authors' contributions*

18  
19 391 NW, MvDB, HvdH and MZ contributed substantially to the conception of the work. Each author contributed  
20  
21 392 substantially to the design of the work. NW, MvdB and MZ contributed substantially to the acquisition and  
22  
23 393 analysis of the data. Each author contributed substantially to the interpretation of the data. NW drafted the  
24  
25 394 manuscript. Each author contributed substantially to the revision of the work.

26  
27  
28 395 Each author approved the submitted version. Each author agrees to be personally accountable for the author's  
29  
30 396 own contributions and to ensure that questions related to the accuracy or integrity of any part of the work,  
31  
32 397 even ones in which the author was not personally involved, are appropriately investigated, resolved, and the  
33  
34 398 resolution documented in the literature.

35  
36  
37  
38 399 *Availability of data and materials*

39  
40 400 The data used and/or analysed during the current study are available from the corresponding author on  
41  
42 401 reasonable request.

43  
44 402 *Acknowledgements*

45  
46 403 We would like to thank the Dutch ICU patient organization (FCIC) for their knowledge and help.

47  
48  
49 404 *Word count*

50  
51 405 3523

52  
53 406

54  
55  
56 407

57  
58  
59 408  
60

409 **References**

- 410 1. Davidson JE, Aslakson RA, Long AC, Puntillo KA, Kross EK, Hart J, et al. Guidelines for Family-Centered  
411 Care in the Neonatal, Pediatric, and Adult ICU. *Crit Care Med*. 2017;45(1):103-28.
- 412 2. Kon AA, Davidson JE, Morrison W, Danis M, White DB. Shared Decision Making in ICUs: An American  
413 College of Critical Care Medicine and American Thoracic Society Policy Statement. *Crit Care Med*. 2016;44(1):188-  
414 201.
- 415 3. Seeber AA, Pols AJ, Hijdra A, Willems DL. How Dutch neurologists involve families of critically ill patients  
416 in end-of-life care and decision-making. *Neurol Clin Pract*. 2015;5(1):50-7.
- 417 4. Lautrette A, Peigne V, Watts J, Souweine B, Azoulay E. Surrogate decision makers for incompetent ICU  
418 patients: a European perspective. *Curr Opin Crit Care*. 2008;14(6):714-9.
- 419 5. Michalsen A, Long AC, DeKeyser Ganz F, White DB, Jensen HI, Metaxa V, et al. Interprofessional Shared  
420 Decision-Making in the ICU: A Systematic Review and Recommendations From an Expert Panel. *Crit Care Med*.  
421 2019;47(9):1258-66.
- 422 6. Detsky ME, Harhay MO, Bayard DF, Delman AM, Buehler AE, Kent SA, et al. Discriminative Accuracy of  
423 Physician and Nurse Predictions for Survival and Functional Outcomes 6 Months After an ICU Admission. *Jama*.  
424 2017;317(21):2187-95.
- 425 7. Jensen HI, Ammentorp J, Ording H. Guidelines for withholding and withdrawing therapy in the ICU:  
426 impact on decision-making process and interdisciplinary collaboration. *Heart Lung Vessel*. 2013;5(3):158-67.
- 427 8. Bruce CR, Miller SM, Zimmerman JL. A qualitative study exploring moral distress in the ICU team: the  
428 importance of unit functionality and intrateam dynamics. *Crit Care Med*. 2015;43(4):823-31.
- 429 9. Van den Bulcke B, Vyt A, Vanheule S, Hoste E, Decruyenaere J, Benoit D. The perceived quality of  
430 interprofessional teamwork in an intensive care unit: A single centre intervention study. *J Interprof Care*.  
431 2016;30(3):301-8.
- 432 10. Shay LA, Lafata JE. Where is the evidence? A systematic review of shared decision making and patient  
433 outcomes. *Med Decis Making*. 2015;35(1):114-31.
- 434 11. Wieringa TH, Rodriguez-Gutierrez R, Spencer-Bonilla G, de Wit M, Ponce OJ, Sanchez-Herrera MF, et al.  
435 Decision aids that facilitate elements of shared decision making in chronic illnesses: a systematic review. *Syst*  
436 *Rev*. 2019;8(1):121.
- 437 12. Hart JL, Harhay MO, Gabler NB, Ratcliffe SJ, Quill CM, Halpern SD. Variability Among US Intensive Care  
438 Units in Managing the Care of Patients Admitted With Preexisting Limits on Life-Sustaining Therapies. *JAMA*  
439 *Internal Medicine*. 2015;175(6):1019-26.
- 440 13. McKenzie MS, Auriemma CL, Olenik J, Cooney E, Gabler NB, Halpern SD. An Observational Study of  
441 Decision Making by Medical Intensivists. *Critical Care Medicine*. 2015;43(8):1660-8.
- 442 14. Scheunemann LP, Ernecoff NC, Buddadhumaruk P, Carson SS, Hough CL, Curtis JR, et al. Clinician-Family  
443 Communication About Patients' Values and Preferences in Intensive Care Units. *JAMA Intern Med*.  
444 2019;179(5):676-84.
- 445 15. Vasher ST, Oppenheim IM, Sharma Basyal P, Lee EM, Hayes MM, Turnbull AE. Physician Self-assessment  
446 of Shared Decision-making in Simulated Intensive Care Unit Family Meetings. *JAMA Netw Open*.  
447 2020;3(5):e205188.
- 448 16. Anstey MH, Litton E, Jha N, Trevenen ML, Webb S, Mitchell IA. A comparison of the opinions of intensive  
449 care unit staff and family members of the treatment intensity received by patients admitted to an intensive care  
450 unit: A multicentre survey. *Aust Crit Care*. 2019;32(5):378-82.
- 451 17. Beeby JP. Intensive care nurses' experiences of caring. Part 2: Research findings. *Intensive Crit Care Nurs*.  
452 2000;16(3):151-63.
- 453 18. Gustafson A. Reducing Patient Uncertainty: Implementation of a Shared Decision-Making Process  
454 Enhances Treatment Quality and Provider Communication. *Clin J Oncol Nurs*. 2017;21(1):113-5.
- 455 19. Bibas L, Peretz-Larochelle M, Adhikari NK, Goldfarb MJ, Luk A, Englesakis M, et al. Association of  
456 Surrogate Decision-making Interventions for Critically Ill Adults With Patient, Family, and Resource Use  
457 Outcomes: A Systematic Review and Meta-analysis. *JAMA Netw Open*. 2019;2(7):e197229.
- 458 20. Verharen L, Mintjes J, Kaljouw M, Melief W, Schilder L, van der Laan G. Psychosocial Needs of Relatives  
459 of Trauma Patients. *Health Soc Work*. 2015;40(3):233-8.
- 460 21. Gross J, Williams B, Fade P, Brett SJ. Intensive care: balancing risk and benefit to facilitate informed  
461 decisions. *Bmj*. 2018;363:k4135.
- 462 22. Gustin AN, Jr. Shared Decision-Making. *Anesthesiol Clin*. 2019;37(3):573-80.



1  
2  
3  
4  
5  
6  
7  
8  
9  
10  
11  
12  
13  
14  
15  
16  
17  
18  
19  
20  
21  
22  
23  
24  
25  
26  
27  
28  
29  
30  
31  
32  
33  
34  
35  
36  
37  
38  
39  
40  
41  
42  
43  
44  
45  
46  
47  
48  
49  
50  
51  
52  
53  
54  
55  
56  
57  
58  
59  
60

23. White DB, Angus DC, Shields AM, Buddadhumaruk P, Pidro C, Paner C, et al. A Randomized Trial of a Family-Support Intervention in Intensive Care Units. *N Engl J Med*. 2018;378(25):2365-75.
24. Fried TR. Communication About Treatment Options and Shared Decision Making in the Intensive Care Unit. *JAMA Intern Med*. 2019;179(5):684-5.
25. Curtis JR, Tonelli MR. Shared decision-making in the ICU: value, challenges, and limitations. *Am J Respir Crit Care Med*. 2011;183(7):840-1.
26. Olding M, McMillan SE, Reeves S, Schmitt MH, Puntillo K, Kitto S. Patient and family involvement in adult critical and intensive care settings: a scoping review. *Health Expect*. 2016;19(6):1183-202.
27. Tong A, Sainsbury P, Craig J. Consolidated criteria for reporting qualitative research (COREQ): a 32-item checklist for interviews and focus groups. *Int J Qual Health Care*. 2007;19(6):349-57.
28. Chapman AL, Hadfield M, Chapman CJ. Qualitative research in healthcare: an introduction to grounded theory using thematic analysis. *J R Coll Physicians Edinb*. 2015;45(3):201-5.
29. Brooks LA, Manias E, Nicholson P. Communication and Decision-Making About End-of-Life Care in the Intensive Care Unit. *Am J Crit Care*. 2017;26(4):336-41.
30. Lautrette A, Darmon M, Megarbane B, Joly LM, Chevret S, Adrie C, et al. A communication strategy and brochure for relatives of patients dying in the ICU. *N Engl J Med*. 2007;356(5):469-78.
31. White DB, Braddock CH, 3rd, Berecknyei S, Curtis JR. Toward shared decision making at the end of life in intensive care units: opportunities for improvement. *Arch Intern Med*. 2007;167(5):461-7.
32. Oerlemans AJM, Knippenberg ML, Olthuis GJ. Learning shared decision-making in clinical practice. *Patient Educ Couns*. 2020.
33. Lorin S, Rho L, Wisnivesky JP, Nierman DM. Improving medical student intensive care unit communication skills: a novel educational initiative using standardized family members. *Crit Care Med*. 2006;34(9):2386-91.
34. Azoulay É, Pochard F, Chevret S, Adrie C, Annane D, Bleichner G, et al. Half the family members of intensive care unit patients do not want to share in the decision-making process: A study in 78 French intensive care units\*. *Critical Care Medicine*. 2004;32(9):1832-8.
35. Nelson JE, Puntillo KA, Pronovost PJ, Walker AS, McAdam JL, Ilaoa D, et al. In their own words: patients and families define high-quality palliative care in the intensive care unit. *Crit Care Med*. 2010;38(3):808-18.
36. Kalocsai C, Amaral A, Piquette D, Walter G, Dev SP, Taylor P, et al. "It's better to have three brains working instead of one": a qualitative study of building therapeutic alliance with family members of critically ill patients. *BMC Health Serv Res*. 2018;18(1):533.
37. Joseph-Williams N, Elwyn G, Edwards A. Knowledge is not power for patients: a systematic review and thematic synthesis of patient-reported barriers and facilitators to shared decision making. *Patient Educ Couns*. 2014;94(3):291-309.
38. Richards CA, Starks H, O'Connor MR, Bourget E, Hays RM, Doorenbos AZ. Physicians Perceptions of Shared Decision-Making in Neonatal and Pediatric Critical Care. *Am J Hosp Palliat Care*. 2018;35(4):669-76.
39. Wilcox ME, Ely EW. Challenges in conducting long-term outcomes studies in critical care. *Curr Opin Crit Care*. 2019;25(5):473-88.
40. Geense W, Zegers M, Vermeulen H, van den Boogaard M, van der Hoeven J. MONITOR-IC study, a mixed methods prospective multicentre controlled cohort study assessing 5-year outcomes of ICU survivors and related healthcare costs: a study protocol. *BMJ Open*. 2017;7(11):e018006.
41. House S, Havens D. Nurses' and Physicians' Perceptions of Nurse-Physician Collaboration: A Systematic Review. *J Nurs Adm*. 2017;47(3):165-71.
42. Pecanac KE, Schwarze ML. Conflict in the intensive care unit: Nursing advocacy and surgical agency. *Nurs Ethics*. 2018;25(1):69-79.
43. Studdert DM, Mello MM, Burns JP, Puopolo AL, Galper BZ, Truog RD, et al. Conflict in the care of patients with prolonged stay in the ICU: types, sources, and predictors. *Intensive Care Med*. 2003;29(9):1489-97.
44. Edwards MP, Thronson K, Dyck F. Critical care nurses' perceptions of their roles in family-team conflicts related to treatment plans. *Can J Nurs Res*. 2012;44(1):61-75.
45. Weidema FC, Molewijk BA, Kamsteeg F, Widdershoven GA. Aims and harvest of moral case deliberation. *Nurs Ethics*. 2013;20(6):617-31.
46. Adams A, Mannix T, Harrington A. Nurses' communication with families in the intensive care unit - a literature review. *Nurs Crit Care*. 2017;22(2):70-80.
47. Puntillo KA, McAdam JL. Communication between physicians and nurses as a target for improving end-of-life care in the intensive care unit: challenges and opportunities for moving forward. *Crit Care Med*. 2006;34(11 Suppl):S332-40.

- 1  
2  
3 519 48. van Beusekom I, Bakhshi-Raiez F, de Keizer NF, van der Schaaf M, Termorshuizen F, Dongelmans DA.  
4 520 Dutch ICU survivors have more consultations with general practitioners before and after ICU admission compared  
5 521 to a matched control group from the general population. PLoS One. 2019;14(5):e0217225.  
6 522 49. Scholl I, LaRussa A, Hahlweg P, Kobrin S, Elwyn G. Organizational- and system-level characteristics that  
7 523 influence implementation of shared decision-making and strategies to address them - a scoping review.  
8 524 Implement Sci. 2018;13(1):40.  
9 525 50. Giuliani E, Melegari G, Carrieri F, Barbieri A. Overview of the main challenges in shared decision making  
10 526 in a multicultural and diverse society in the intensive and critical care setting. J Eval Clin Pract. 2020;26(2):520-3.  
11 527 51. Guest G, Bunce A, Johnson L. How Many Interviews Are Enough?:An Experiment with Data Saturation  
12 528 and Variability. Field Methods. 2006;18(1):59-82.  
13 529  
14  
15 530  
16  
17 531  
18  
19 532  
20  
21 533  
22  
23 534  
24  
25  
26 536  
27  
28 537  
29  
30 538  
31  
32 539  
33  
34 540  
35  
36 541  
37  
38 542  
39  
40 543  
41  
42 544  
43  
44 545  
45  
46 546  
47  
48 547  
49  
50 548  
51  
52 549  
53  
54 550  
55  
56 551  
57  
58 552  
59  
60

For peer review only

1  
2  
3  
4  
5  
6  
7  
8  
9  
10  
11  
12  
13  
14  
15  
16  
17  
18  
19  
20  
21  
22  
23  
24  
25  
26  
27  
28  
29  
30  
31  
32  
33  
34  
35  
36  
37  
38  
39  
40  
41  
42  
43  
44  
45  
46  
47  
48  
49  
50  
51  
52  
53  
54  
55  
56  
57  
58  
59  
60

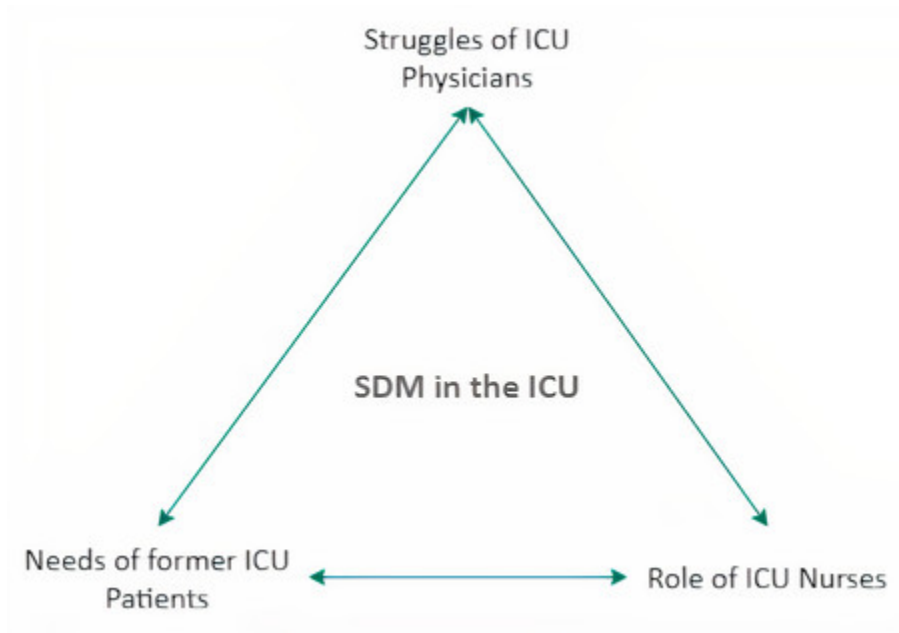

Figure 1. ICU physicians mainly spoke of struggles with implementing SDM in the ICU, while patients and families elaborated on their needs, and ICU nurses talked about how their current role in the ICU decision-making process could be improved.

38x26mm (300 x 300 DPI)

1 **Supplementary Materials**2 *Supplementary material 1: COREQ Checklist*

| Topic                                          | Item No. | Guide Questions/Description                                                                                                                              | Reported on Page No. |
|------------------------------------------------|----------|----------------------------------------------------------------------------------------------------------------------------------------------------------|----------------------|
| <b>Domain 1: Research team and reflexivity</b> |          |                                                                                                                                                          |                      |
| <i>Personal characteristics</i>                |          |                                                                                                                                                          |                      |
| Interviewer/facilitator                        | 1        | Which author/s conducted the interview or focus group?                                                                                                   | 4                    |
| Credentials                                    | 2        | What were the researcher's credentials? E.g. PhD, MD                                                                                                     | 1                    |
| Occupation                                     | 3        | What was their occupation at the time of the study?                                                                                                      | 1                    |
| Gender                                         | 4        | Was the researcher male or female?                                                                                                                       | 1                    |
| Experience and training                        | 5        | What experience or training did the researcher have?                                                                                                     | 4                    |
| <i>Relationship with participants</i>          |          |                                                                                                                                                          |                      |
| Relationship established                       | 6        | Was a relationship established prior to study commencement?                                                                                              | 4                    |
| Participant knowledge of the interviewer       | 7        | What did the participants know about the researcher? e.g. personal goals, reasons for doing the research                                                 | 4                    |
| Interviewer characteristics                    | 8        | What characteristics were reported about the interviewer/facilitator? e.g. Bias, assumptions, reasons and interests in the research topic                | 4                    |
| <b>Domain 2: Study design</b>                  |          |                                                                                                                                                          |                      |
| <i>Theoretical framework</i>                   |          |                                                                                                                                                          |                      |
| Methodological orientation and Theory          | 9        | What methodological orientation was stated to underpin the study? e.g. grounded theory, discourse analysis, ethnography, phenomenology, content analysis | 4                    |
| <i>Participant selection</i>                   |          |                                                                                                                                                          |                      |
| Sampling                                       | 10       | How were participants selected? e.g. purposive, convenience, consecutive, snowball                                                                       | 4                    |
| Method of approach                             | 11       | How were participants approached? e.g. face-to-face, telephone, mail, email                                                                              | 4                    |
| Sample size                                    | 12       | How many participants were in the study?                                                                                                                 | 6                    |
| Non-participation                              | 13       | How many people refused to participate or dropped out? Reasons?                                                                                          | 6                    |
| <i>Setting</i>                                 |          |                                                                                                                                                          |                      |
| Setting of data collection                     | 14       | Where was the data collected? e.g. home, clinic, workplace                                                                                               | 4                    |
| Presence of non-participants                   | 15       | Was anyone else present besides the participants and researchers?                                                                                        | 4                    |
| Description of sample                          | 16       | What are the important characteristics of the sample? e.g. demographic data, date                                                                        | 6                    |
| <i>Data collection</i>                         |          |                                                                                                                                                          |                      |
| Interview guide                                | 17       | Were questions, prompts, guides provided by the authors? Was it pilot tested?                                                                            | 4                    |
| Repeat interviews                              | 18       | Were repeat interviews carried out? If yes, how many?                                                                                                    | 4                    |
| Audio/visual recording                         | 19       | Did the research use audio or visual recording to collect the data?                                                                                      | 4                    |
| Field notes                                    | 20       | Were field notes made during and/or after the interview or focus group?                                                                                  | 4                    |

|                                        |    |                                                                                                                                 |      |
|----------------------------------------|----|---------------------------------------------------------------------------------------------------------------------------------|------|
| Duration                               | 21 | What was the duration of the inter views or focus group?                                                                        | 6    |
| Data saturation                        | 22 | Was data saturation discussed?                                                                                                  | 4    |
| Transcripts returned                   | 23 | Were transcripts returned to participants for comment and/or correction?                                                        | 4    |
| <b>Domain 3: analysis and findings</b> |    |                                                                                                                                 |      |
| <i>Data analysis</i>                   |    |                                                                                                                                 |      |
| Number of data coders                  | 24 | How many data coders coded the data?                                                                                            | 5    |
| Description of the coding tree         | 25 | Did authors provide a description of the coding tree?                                                                           | -    |
| Derivation of themes                   | 26 | Were themes identified in advance or derived from the data?                                                                     | 4    |
| Software                               | 27 | What software, if applicable, was used to manage the data?                                                                      | 5    |
| Participant checking                   | 28 | Did participants provide feedback on the findings?                                                                              | 4    |
| <i>Reporting</i>                       |    |                                                                                                                                 |      |
| Quotations presented                   | 29 | Were participant quotations presented to illustrate the themes/findings? Was each quotation identified? e.g. participant number | 7-14 |
| Data and findings consistent           | 30 | Was there consistency between the data presented and the findings?                                                              | 7-14 |
| Clarity of major themes                | 31 | Were major themes clearly presented in the findings?                                                                            | 7-14 |
| Clarity of minor themes                | 32 | Is there a description of diverse cases or discussion of minor themes?                                                          | 7-14 |

Developed from: Tong A, Sainsbury P, Craig J. Consolidated criteria for reporting qualitative research (COREQ): a 32-item checklist for interviews and focus groups. *International Journal for Quality in Health Care*. 2007. Volume 19, Number 6: pp. 349 – 357

19 *Supplementary material 2: Preliminary data collection used to develop Topic guide.*

20 *Table 1. Preliminary data inventory used to develop Topic guide. Data was collected at the ICU patient*  
 21 *organization symposium, following the authors' presentation about SDM in the ICU. The audience, consisting of*  
 22 *ICU physicians, ICU nurses, and former patients and their family members, were asked to write down their views*  
 23 *on what was needed and what they saw as barriers to implementing SDM in the ICU. Notes were received from*  
 24 *54 individuals. The information was categorized in six topics. Some factors were mentioned multiple times.*

| <b>Category</b>                                      | <b>Quotes</b>                                                                                                                                                                                                                                                                                                                                                                                                                                                                                                                                                                                                                                                                                                                                                                                                                                                                                                                                          |
|------------------------------------------------------|--------------------------------------------------------------------------------------------------------------------------------------------------------------------------------------------------------------------------------------------------------------------------------------------------------------------------------------------------------------------------------------------------------------------------------------------------------------------------------------------------------------------------------------------------------------------------------------------------------------------------------------------------------------------------------------------------------------------------------------------------------------------------------------------------------------------------------------------------------------------------------------------------------------------------------------------------------|
| <b>Time</b>                                          | 'Often there is a lack of time in acute settings' to properly talk, listen and explain. This is necessary to really talk though the consequences of certain choices.'<br>'No time to sit with patients or surrogates before treatment starts'<br>'As a clinician I expect there to be space for conversation regardless of the point in time'                                                                                                                                                                                                                                                                                                                                                                                                                                                                                                                                                                                                          |
| <b>Factors pertaining to Patients and surrogates</b> | 'More human, less patient'<br>'How did the patient function before admission?'<br>'What do the patient and family want? How far do they want to go?'<br>'But what if the patient is sedated?! Permission needed to share decision-making in their place.'<br>'Jump from ICU to home is large. Care is taken care of by GP, but they aren't specialists..'<br>'Don't just monitor the patients' QoL, but the entire family's'<br>'In order to share decision-making you need access to the medical dossier and visit patient whenever.'<br>'Being involved in assessment emotions and mental health symptoms of patients'<br>'Being allowed to share care to a degree.'<br>'Direction: it happens to you, but you can't steer. You're dependent on everything.'<br>'Trust, equality, being taken seriously.'<br>'Surrogates' knowledge about what the patient truly wants.'<br>'Talk through resuscitation preference.'                                 |
| <b>Factors pertaining to clinicians</b>              | 'A multidisciplinary meeting with different medical specialists about recovery possibilities.'<br>'Explain where possible before admission. When admission is planned, in the outpatient clinic.'<br>'Talk about a possible ICU admission with the GP before it happens.'<br>'Talk about treatment limitations before ICU admission'<br>'Physician who dares to discuss difficult topics'<br>'Nurses can talk through things with patients and families beforehand, as a bridge toward the physician. Physicians have to be open to this information'<br>'More information about who the patient is as a human being before they were admitted'<br>'When a patient is transferred, this is about more than just medical facets. Also: rehabilitation, GP, etc.'<br>'Trust that we act in the patient's best interests.'<br>'Ethical or moral deliberation in the ICU.'<br>'Passionate clinicians who value SDM.'<br>'As a topic to nurses' education.' |

|                               |                                                                                                                                                                                                                                                                                                                                                                                                                                                                                                                                                                                                                                                                                                                                                                                                                                                                                           |
|-------------------------------|-------------------------------------------------------------------------------------------------------------------------------------------------------------------------------------------------------------------------------------------------------------------------------------------------------------------------------------------------------------------------------------------------------------------------------------------------------------------------------------------------------------------------------------------------------------------------------------------------------------------------------------------------------------------------------------------------------------------------------------------------------------------------------------------------------------------------------------------------------------------------------------------|
|                               | <p>'Keep remembering that as a physician you should not put the responsibility at the family members' feet'</p> <p>'Clinician expects: don't force it.'</p>                                                                                                                                                                                                                                                                                                                                                                                                                                                                                                                                                                                                                                                                                                                               |
| <b>Organizational factors</b> | <p>'More attention for Post-ICU Syndrome in all facets of the organization.'</p> <p>'One person as the main communicator, or communication and information coach'</p> <p>'A truly multidisciplinary conference: social, psychological and medical. Maybe even with family members.'</p> <p>'Clear, shared vision about SDM in entire team.'</p> <p>'Acknowledge the importance of SDM.'</p> <p>'Knowledge within treatment team about communication to and between patients and family members.'</p> <p>'Practical tips, courses and education'.</p>                                                                                                                                                                                                                                                                                                                                      |
| <b>Information</b>            | <p>'Patients and family members need good information about prognosis and treatment possibilities to decide. Also: how can you provide personalized information, while keeping cultural background, health skills, etc. in mind'</p> <p>'Clarity about the consequences of some choices, what are the consequences of not treating, what will and won't you choose'</p> <p>'Clear explanations about the current situation'</p> <p>'Long-term data.'</p> <p>'Use social workers.'</p> <p>'Information in the outpatient clinic.'</p> <p>'Information about wishes, expectations, pre-existent functioning – this only comes up later in the treatment trajectory instead of at the start'</p> <p>'Patients and family members need a prognosis to examine whether treatment is in line with wishes and expectations for QoL'</p> <p>'Explanation: what does an ICU-admission entail?'</p> |
| <b>Miscellaneous</b>          | <p>'Not going to the ICU does not always equal stopping treatment. Palliative sedation is treatment too.'</p> <p>'Not resuscitating does not mean there is no treatment happening.'</p>                                                                                                                                                                                                                                                                                                                                                                                                                                                                                                                                                                                                                                                                                                   |

25

26

27

28

29

30

31

32

33

34

35

36

37

1  
2  
3 38 *Supplementary material 3: Clinician Topic Guide*  
4

5 39 - Can you describe the current process of ICU-admission and treatment? What is your role in this process? Can  
6  
7 40 you name an example of your experiences with these processes?

8  
9 41 - How do you experience the degree of involvement of ICU nurses in the ICU decision-making process? Can you  
10  
11 42 name an example of your possible experiences with involving the ICU nurse in the ICU decision-making process?

12  
13 43 Should the ICU nurse have a bigger role in the ICU decision process? Why?

14  
15 44 - How does the multidisciplinary meeting contribute to the ICU decision-making process? Can its current role be  
16  
17 45 improved upon?

18  
19 46 - How do you experience the degree of involvement of patients and family members in the ICU decision-making  
20  
21 47 process? Should they be involved more? What would the advantages and disadvantages of involving them more

22  
23 48 be? What is needed in order to involve them more? What information is important and needed to allow patients  
24  
25 49 and their family members to share in the decision-making process?

26  
27 50

28  
29 51

30  
31 52

32  
33 53

34  
35 54

36  
37 55

38  
39 56

40  
41 57

42  
43 58

44  
45 59

46  
47 60

48  
49 61

50  
51 62

52  
53 63

54  
55 64

56  
57 65

58  
59 66

60



1  
2  
3 67 *Supplementary material 4: Former patient and family member Topic Guide*  
4

5 68 - Why were you admitted to the ICU? Can you describe the period of admission for me?  
6

7 69 - How were decisions regarding ICU admission made? Who was consulted? Were you involved in these decisions?  
8

9 70 Can you give me an example of your experiences regarding admission decision making?  
10

11 71 - How were decisions regarding ICU treatment made? Who was consulted? Were you involved in these decisions?  
12

13 72 Can you give me an example of your experiences regarding admission decision making?  
14

15 73 - What information do you think is of importance when talking about ICU admission and treatment decision  
16

17 74 making?  
18

19 75 - Would you or your family member have liked to be more involved in the ICU decision process? If yes, how?  
20

21 76 What would you have needed to achieve this? If no, why not?  
22

23 77  
24

25 78  
26

27 79  
28

29 80  
30

31 81  
32

33 82  
34

35 83  
36

37 84  
38

39 85  
40

41 86  
42  
43  
44  
45  
46  
47  
48  
49  
50  
51  
52  
53  
54  
55  
56  
57  
58  
59  
60

## COREQ (CONsolidated criteria for REporting Qualitative research) Checklist

A checklist of items that should be included in reports of qualitative research. You must report the page number in your manuscript where you consider each of the items listed in this checklist. If you have not included this information, either revise your manuscript accordingly before submitting or note N/A.

| Topic                                          | Item No. | Guide Questions/Description                                                                                                                              | Reported on Page No. |
|------------------------------------------------|----------|----------------------------------------------------------------------------------------------------------------------------------------------------------|----------------------|
| <b>Domain 1: Research team and reflexivity</b> |          |                                                                                                                                                          |                      |
| <i>Personal characteristics</i>                |          |                                                                                                                                                          |                      |
| Interviewer/facilitator                        | 1        | Which author/s conducted the interview or focus group?                                                                                                   |                      |
| Credentials                                    | 2        | What were the researcher's credentials? E.g. PhD, MD                                                                                                     |                      |
| Occupation                                     | 3        | What was their occupation at the time of the study?                                                                                                      |                      |
| Gender                                         | 4        | Was the researcher male or female?                                                                                                                       |                      |
| Experience and training                        | 5        | What experience or training did the researcher have?                                                                                                     |                      |
| <i>Relationship with participants</i>          |          |                                                                                                                                                          |                      |
| Relationship established                       | 6        | Was a relationship established prior to study commencement?                                                                                              |                      |
| Participant knowledge of the interviewer       | 7        | What did the participants know about the researcher? e.g. personal goals, reasons for doing the research                                                 |                      |
| Interviewer characteristics                    | 8        | What characteristics were reported about the interviewer/facilitator? e.g. Bias, assumptions, reasons and interests in the research topic                |                      |
| <b>Domain 2: Study design</b>                  |          |                                                                                                                                                          |                      |
| <i>Theoretical framework</i>                   |          |                                                                                                                                                          |                      |
| Methodological orientation and Theory          | 9        | What methodological orientation was stated to underpin the study? e.g. grounded theory, discourse analysis, ethnography, phenomenology, content analysis |                      |
| <i>Participant selection</i>                   |          |                                                                                                                                                          |                      |
| Sampling                                       | 10       | How were participants selected? e.g. purposive, convenience, consecutive, snowball                                                                       |                      |
| Method of approach                             | 11       | How were participants approached? e.g. face-to-face, telephone, mail, email                                                                              |                      |
| Sample size                                    | 12       | How many participants were in the study?                                                                                                                 |                      |
| Non-participation                              | 13       | How many people refused to participate or dropped out? Reasons?                                                                                          |                      |
| <i>Setting</i>                                 |          |                                                                                                                                                          |                      |
| Setting of data collection                     | 14       | Where was the data collected? e.g. home, clinic, workplace                                                                                               |                      |
| Presence of non-participants                   | 15       | Was anyone else present besides the participants and researchers?                                                                                        |                      |
| Description of sample                          | 16       | What are the important characteristics of the sample? e.g. demographic data, date                                                                        |                      |
| <i>Data collection</i>                         |          |                                                                                                                                                          |                      |
| Interview guide                                | 17       | Were questions, prompts, guides provided by the authors? Was it pilot tested?                                                                            |                      |
| Repeat interviews                              | 18       | Were repeat interviews carried out? If yes, how many?                                                                                                    |                      |
| Audio/visual recording                         | 19       | Did the research use audio or visual recording to collect the data?                                                                                      |                      |
| Field notes                                    | 20       | Were field notes made during and/or after the interview or focus group?                                                                                  |                      |
| Duration                                       | 21       | What was the duration of the interviews or focus group?                                                                                                  |                      |
| Data saturation                                | 22       | Was data saturation discussed?                                                                                                                           |                      |
| Transcripts returned                           | 23       | Were transcripts returned to participants for comment and/or                                                                                             |                      |

| Topic                                  | Item No. | Guide Questions/Description                                                                                                        | Reported on Page No. |
|----------------------------------------|----------|------------------------------------------------------------------------------------------------------------------------------------|----------------------|
|                                        |          | correction?                                                                                                                        |                      |
| <b>Domain 3: analysis and findings</b> |          |                                                                                                                                    |                      |
| <i>Data analysis</i>                   |          |                                                                                                                                    |                      |
| Number of data coders                  | 24       | How many data coders coded the data?                                                                                               |                      |
| Description of the coding tree         | 25       | Did authors provide a description of the coding tree?                                                                              |                      |
| Derivation of themes                   | 26       | Were themes identified in advance or derived from the data?                                                                        |                      |
| Software                               | 27       | What software, if applicable, was used to manage the data?                                                                         |                      |
| Participant checking                   | 28       | Did participants provide feedback on the findings?                                                                                 |                      |
| <i>Reporting</i>                       |          |                                                                                                                                    |                      |
| Quotations presented                   | 29       | Were participant quotations presented to illustrate the themes/findings?<br>Was each quotation identified? e.g. participant number |                      |
| Data and findings consistent           | 30       | Was there consistency between the data presented and the findings?                                                                 |                      |
| Clarity of major themes                | 31       | Were major themes clearly presented in the findings?                                                                               |                      |
| Clarity of minor themes                | 32       | Is there a description of diverse cases or discussion of minor themes?                                                             |                      |

Developed from: Tong A, Sainsbury P, Craig J. Consolidated criteria for reporting qualitative research (COREQ): a 32-item checklist for interviews and focus groups. *International Journal for Quality in Health Care*. 2007. Volume 19, Number 6: pp. 349 – 357

**Once you have completed this checklist, please save a copy and upload it as part of your submission. DO NOT include this checklist as part of the main manuscript document. It must be uploaded as a separate file.**

# BMJ Open

## Shared Decision Making in the ICU from the perspective of physicians, nurses and patients: A Qualitative Interview study

|                                 |                                                                                                                                                                                         |
|---------------------------------|-----------------------------------------------------------------------------------------------------------------------------------------------------------------------------------------|
| Journal:                        | <i>BMJ Open</i>                                                                                                                                                                         |
| Manuscript ID                   | bmjopen-2021-050134.R1                                                                                                                                                                  |
| Article Type:                   | Original research                                                                                                                                                                       |
| Date Submitted by the Author:   | 06-Jun-2021                                                                                                                                                                             |
| Complete List of Authors:       | Wubben, Nina; Radboudumc, Intensive Care van den Boogaard, Mark; Radboudumc, Intensive care van der Hoeven, J.G; Radboudumc, Intensive care Zegers, Marieke; Radboudumc, Intensive Care |
| <b>Primary Subject Heading</b>: | Intensive care                                                                                                                                                                          |
| Secondary Subject Heading:      | Qualitative research                                                                                                                                                                    |
| Keywords:                       | Adult intensive & critical care < INTENSIVE & CRITICAL CARE, QUALITATIVE RESEARCH, MEDICAL ETHICS                                                                                       |
|                                 |                                                                                                                                                                                         |

SCHOLARONE™  
Manuscripts



I, the Submitting Author has the right to grant and does grant on behalf of all authors of the Work (as defined in the below author licence), an exclusive licence and/or a non-exclusive licence for contributions from authors who are: i) UK Crown employees; ii) where BMJ has agreed a CC-BY licence shall apply, and/or iii) in accordance with the terms applicable for US Federal Government officers or employees acting as part of their official duties; on a worldwide, perpetual, irrevocable, royalty-free basis to BMJ Publishing Group Ltd ("BMJ") its licensees and where the relevant Journal is co-owned by BMJ to the co-owners of the Journal, to publish the Work in this journal and any other BMJ products and to exploit all rights, as set out in our [licence](#).

The Submitting Author accepts and understands that any supply made under these terms is made by BMJ to the Submitting Author unless you are acting as an employee on behalf of your employer or a postgraduate student of an affiliated institution which is paying any applicable article publishing charge ("APC") for Open Access articles. Where the Submitting Author wishes to make the Work available on an Open Access basis (and intends to pay the relevant APC), the terms of reuse of such Open Access shall be governed by a Creative Commons licence – details of these licences and which [Creative Commons](#) licence will apply to this Work are set out in our licence referred to above.

Other than as permitted in any relevant BMJ Author's Self Archiving Policies, I confirm this Work has not been accepted for publication elsewhere, is not being considered for publication elsewhere and does not duplicate material already published. I confirm all authors consent to publication of this Work and authorise the granting of this licence.

1  
2  
3 1 **Shared Decision Making in the ICU from the perspective of physicians, nurses and patients: A Qualitative**  
4  
5 2 **Interview study**

6  
7 3 Nina Wubben, MSc<sup>1</sup>, Mark van den Boogaard, RN, PhD<sup>1</sup>, Johannes G van der Hoeven, MD, PhD<sup>1</sup>, Marieke  
8  
9 4 Zegers, PhD<sup>1</sup>

10  
11 5  
12  
13 6 1. Radboud university medical center, Radboud Institute for Health Sciences, Department Intensive Care,  
14  
15 7 Nijmegen, The Netherlands

16  
17 8  
18  
19 9  
20  
21 10  
22  
23 11  
24  
25 12  
26  
27 13  
28  
29 14  
30  
31 15  
32  
33 16  
34  
35 17  
36  
37 18  
38  
39 19  
40  
41 20  
42  
43 21 **Corresponding author: Dr Marieke Zegers**

44  
45 22 Institution where work was performed: the Department of Intensive Care Medicine of the Radboud University  
46  
47 23 Medical Center in Nijmegen, the Netherlands.

48  
49 24  
50  
51 25 **Author email addresses**

52  
53 26 Nina Wubben [nina.wubben@radboudumc.nl](mailto:nina.wubben@radboudumc.nl)

54  
55 27 Mark van den Boogaard [mark.vandenboogaard@radboudumc.nl](mailto:mark.vandenboogaard@radboudumc.nl)

56  
57 28 Johannes van der Hoeven [hans.vanderhoeven@radboudumc.nl](mailto:hans.vanderhoeven@radboudumc.nl)

58  
59 29 Marieke Zegers [marieke.zegers@radboudumc.nl](mailto:marieke.zegers@radboudumc.nl)

## 30 **Abstract**

31 **OBJECTIVE** To identify views, experiences, and needs for Shared Decision Making (SDM) in the ICU according to  
32 ICU physicians, ICU nurses, and former ICU patients and their close family members.

33 **DESIGN** Qualitative study.

34 **SETTING** Two Dutch tertiary centers.

35 **PARTICIPANTS** 19 interviews were held with 29 participants: seven with ICU physicians from two tertiary centers,  
36 five with ICU nurses from one tertiary center, and nine with former ICU patients, of whom seven brought one or  
37 two of their close family members who had been involved in the ICU stay.

38 **RESULTS** Three themes, encompassing a total of 16 categories, were identified pertaining to struggles of ICU  
39 physicians, needs of former ICU patients and their family members, and the preferred role of ICU nurses. The  
40 main struggles ICU physicians encountered with SDM include uncertainty about long-term health outcomes, time  
41 constraints, feeling pressure because of having final responsibility, and a fear of losing control. Former patients  
42 and family members mainly expressed aspects they missed, such as not feeling included in ICU treatment  
43 decisions and a lack of information about long-term outcomes and recovery. ICU nurses reported mainly  
44 opportunities to strengthen their role in incorporating non-medical information in the ICU decision-making  
45 process and as liaison between physicians, and patients and family.

46 **CONCLUSIONS** Interviewed stakeholders reported struggles, needs and an elucidation of their current and  
47 preferred role in the SDM process in the ICU. This study signals an essential need for more long-term outcome  
48 information, a more informal inclusion of patients and their family members in decision-making processes, and  
49 a more substantial role for ICU nurses to integrate patients' values and needs in the decision-making process.

50 **Keywords:** Shared decision-making, Qualitative study, Interview study, Family, Patient experiences, Critical Care

### 52 **Strengths and limitations of this study**

- 53 • Strengths of our study contain the inclusion of diverse samplings of the three major stakeholder groups  
54 for SDM in the ICU, and interviews were held until data saturation was reached
- 55 • Thorough analysis lead to the identification of three overarching themes and corresponding categories
- 56 • A limitation is that clinician participants were recruited from two tertiary centers
- 57 • Views and articulations of experiences are influenced by culture and should be verified in more  
58 international qualitative studies

## 59 **Background**

60 Shared decision-making (SDM) has been endorsed as the most ethical and appropriate decision making approach  
61 (1, 2). SDM is defined as a cooperative process between clinicians and patients and, often in the Intensive Care  
62 Unit (ICU), their surrogates that enables a way of healthcare decision making that combines both the clinician's  
63 expertise as well as the patient's values and healthcare goals (3, 4).

64 SDM in the ICU is recommended when defining the overall goals of care and when making major treatment  
65 decisions that are preference-sensitive (2). The SDM process should contain as its three main ingredients:  
66 information exchange, a deliberation period and making an eventual treatment decision. SDM processes  
67 occurring between ICU physicians, ICU nurses and other members of the ICU team are defined as  
68 interprofessional SDM. It is recommended to occur before discussions with patients and family members take  
69 place, to enable the ICU team to speak as one (5). It *is associated* with more accurate prognoses, reduction of  
70 moral distress and a more resilient team (5-9). Overall, ICU physicians, ICU nurses and patients and surrogates  
71 can be viewed as the three pillars of ICU decision-making.

72 Though SDM has received a lot of attention by healthcare policy makers as a proponent of a patient's right to  
73 self-determination, there is a lack of evidence for associations between SDM interventions and patient outcomes  
74 (10, 11). Moreover, its implementation in healthcare settings is oftentimes not without difficulty. There is  
75 enormous diversity in care practices influenced by workplace culture and practice style (12, 13). Clinicians also  
76 interpret guidelines differently, and subsequently do not always follow the recommendations when it comes to  
77 information provision (14, 15). In practice, families might not be seen as decision-makers but rather as informants  
78 who should be protected from feeling responsible for choices made for a loved one (3).

79 While patients and families and clinicians do not always agree when it comes to treatment decision making (16),  
80 making family members feel involved in ICU care and treatment decision-making has been shown to reduce fear  
81 and anxiety and prepares them in aiding patients during their recovery process (17-21). SDM also increases the  
82 likelihood of patients forgoing aggressive care if this is not in line with their care goals (22), though caution is  
83 warranted when decisions can be influenced by the manner in which complex information about disease and  
84 treatment is provided by health care professionals, as well as cultural context (23). SDM interventions are able  
85 to improve families' ratings of quality of communication and shorten the ICU length of stay (24).

86 By elucidating the views of the three main SDM stakeholder groups in current ICU care, it is possible to elaborate  
87 on current ideas about when to incorporate patient and family preferences, when these preferences should be



1  
2  
3  
4  
5  
6  
7  
8  
9  
10  
11  
12  
13  
14  
15  
16  
17  
18  
19  
20  
21  
22  
23  
24  
25  
26  
27  
28  
29  
30  
31  
32  
33  
34  
35  
36  
37  
38  
39  
40  
41  
42  
43  
44  
45  
46  
47  
48  
49  
50  
51  
52  
53  
54  
55  
56  
57  
58  
59  
60

88 overridden by clinicians and how clinicians can improve their own interprofessional SDM (5, 25-27). Therefore,  
89 the aim of this study was to explore the views, experiences, and needs for SDM in the ICU according to ICU  
90 physicians, ICU nurses and former ICU patients and their close family members.

For peer review only

## 117 **Methods**

### 118 *Study design and setting*

119 This is a qualitative interview study carried out between June 2019 and January 2020 in two tertiary centres. The  
120 Consolidated Criteria for Reporting Qualitative Studies guidelines for the design and analysis of this interview  
121 study were followed (28) (See: Supplementary material 1). Decision-making in the ICU between the three  
122 stakeholder groups roughly occurs in daily multidisciplinary meetings mainly attended by ICU physicians, in  
123 regular family conferences where the presence of the ICU nurse is preferred but not required (29), and, more  
124 informally, at the bedside.

125

### 126 *Participant sampling*

127 Three groups of participants were interviewed: ICU physicians, ICU nurses and former ICU patients and their  
128 close family members. Physicians and nurses were approached within the professional network of the authors  
129 (MvdB and MZ), and were sampled purposively to ensure a variety in demographic and professional  
130 characteristics. Former ICU patients and their family members were reached through appealing to patient  
131 association volunteers, as well as an advertisement on the ICU patient association website ([www.fcic.nl](http://www.fcic.nl)). As the  
132 vast majority of ICU patients survive their stay (30), and many studies are focused on the end-of-life patient  
133 category, our patient and family member sampling focused on ICU survivors (31-34).

134

### 135 *Patient and Public Involvement*

136 Former patients and family members were involved in the preparatory phase of this study. Patient organization  
137 board members and the audience members of a patient organization symposium were asked for input into the  
138 topic of SDM in the ICU, which informed the development of the two semi-structured topic guides used in this  
139 study (See: Supplementary material 2). Interview participants responded to an advertisement on the ICU patient  
140 organization website.

141

### 142 *Data collection*

143 All interviews took place face-to-face in either of the two tertiary centres. Two researchers conducted the first  
144 interview (MZ and NW). All subsequent interviews were conducted by one researcher (NW). Both researchers  
145 are trained to conduct interviews and execute interview analysis. Neither of the researchers has clinical training.

1  
2  
3 146 The main interviewer did not have established relationships with any of the interviewees before study  
4  
5 147 commencement. Interviewees were asked to take part in an interview about their experiences with ICU shared  
6  
7 148 decision-making and ICU decision-making in general. The interviewers had not conducted qualitative work  
8  
9 149 regarding this topic before.

10  
11 150 The two topic guides were applied to ICU clinicians and former ICU patients and their family members,  
12  
13 151 respectively. Topics in both guides included experiences with SDM in the ICU, wishes for its expansion in the ICU  
14  
15 152 and changes necessary to achieve this. The translated topic guide can be read in Supplementary materials 3 and  
16  
17 153 4. Data was collected until data saturation was reached, in other words, when no new information was identified  
18  
19 154 in the interviews (35). Transcripts were not returned to participants for comment.

20  
21 155

#### 22 23 156 *Data analysis*

24  
25 157 All audio recordings were transcribed verbatim by an external professional party, and subsequently coded using  
26  
27 158 a grounded theory approach, where categories, themes and codes were derived through the analysis of the data.  
28  
29 159 Coding is an interpretative process in which conceptual labels are assigned to data (36). Two researchers (NW  
30  
31 160 and MZ) coded four interviews independently, before discussing and agreeing upon a coding framework. NW  
32  
33 161 then applied open coding to the remainder of the transcriptions under the general supervision of MZ. Data  
34  
35 162 analysis was performed using Atlas.ti software.

36  
37 163

#### 38 39 164 *Ethical approval*

40  
41 165 The study was approved by the research ethics committee of the Radboud University Medical Center, CMO  
42  
43 166 region Arnhem-Nijmegen (number 2020-6306). Participant information and an invitation for the interview were  
44  
45 167 sent in reply to an informal consent to an interview via e-mail. Additional information about participation was  
46  
47 168 given on request either in the e-mail correspondence or before the start of the interview. An informed consent  
48  
49 169 form was signed before the start of the interview.

50  
51 170

52  
53 171

54  
55 172

56  
57 173

58  
59 174

1  
2  
3 **175 Results**  
4

5 176 In total, 29 participants were interviewed: five ICU nurses, seven ICU physicians, nine former ICU patients and  
6  
7 177 eight family members (Table 1). Former patients and their family members were interviewed together, making  
8  
9 178 for a total of 19 separate interviews. None of the participants dropped out. The interviews took between 30 and  
10  
11 179 75 minutes. 50% of the ICU clinicians and 41.2% of the former patients and family members were male. Mean  
12  
13 180 age was 47.7 (SD: 2.6) and 57.4 (SD: 3.5), respectively. Of the nine former patients, five had had a medical  
14  
15 181 admission (55.6%), three a planned surgery (33.3%) and one an emergency surgery (11.1%). The seven ICU  
16  
17 182 physicians had a median of 12.0 years of work experience [Interquartile range (IQR): 5.0 – 20.0], whereas the  
18  
19 183 median number of work experience years was 18.0 [IQR: 11.0-29.5] for the five ICU nurses.  
20  
21 184  
22  
23

24 **185 Table 1. Participant characteristics**

| <i>Interview order</i> | <i>ICU physicians and nurses</i>                    | <i>Age category</i> | <i>Sex</i> |
|------------------------|-----------------------------------------------------|---------------------|------------|
| 1                      | Intensive Care Nurse                                | <40                 | Male       |
| 2                      | Intensive Care Nurse                                | 40-60               | Female     |
| 3                      | Intensivist                                         | 40-60               | Male       |
| 4                      | Intensivist                                         | 40-60               | Male       |
| 5                      | Intensive Care Nurse                                | 40-60               | Female     |
| 6                      | Intensivist                                         | 40-60               | Female     |
| 7                      | Intensive Care Nurse                                | >60                 | Male       |
| 8                      | Intensive Care Nurse                                | 40-60               | Female     |
| 9                      | Intensivist                                         | 40-60               | Male       |
| 12                     | Intensivist                                         | <40                 | Female     |
| 28                     | Intensivist                                         | 40-60               | Female     |
| 29                     | Intensivist                                         | 40-60               | Male       |
| <i>Interview order</i> | <i>Former ICU patients and their family members</i> | <i>Age category</i> | <i>Sex</i> |
| 10                     | Former patient #1                                   | >60                 | Male       |
| 11                     | Spouse of former patient #1                         | >60                 | Female     |
| 13                     | Former patient #2                                   | 40-60               | Female     |
| 14                     | Former patient #3                                   | >60                 | Male       |
| 15                     | Spouse of former patient #3                         | >60                 | Female     |
| 16                     | Former patient #4                                   | <40                 | Female     |
| 17                     | Former patient #5                                   | <40                 | Female     |
| 18                     | Spouse of former patient #5                         | 40-60               | Male       |
| 19                     | Former patient #6                                   | 40-60               | Male       |
| 20                     | Spouse of former patient #6                         | 40-60               | Female     |
| 21                     | Child of former patient #6                          | <40                 | Female     |
| 22                     | Former patient #7                                   | >60                 | Female     |
| 23                     | Spouse of former patient #7                         | >60                 | Male       |
| 24                     | Former patient #8                                   | >60                 | Male       |
| 25                     | Spouse of former patient #8                         | >60                 | Female     |
| 26                     | Former patient #9                                   | 40-60               | Male       |
| 27                     | Spouse of former patient #9                         | 40-60               | Female     |

58 186

59  
60 187

1  
2  
3 188 The data analysis resulted in 16 categories from which 3 themes were derived: (I) Struggles of ICU physicians  
4  
5 189 (Table 2), (II) Needs of former patients and family members (Table 3), and (III) the Role of the ICU nurse (Table  
6  
7 190 4).  
8

9 191

10  
11 192 ***Theme I: Struggles of ICU physicians***

12  
13 193 A total of eight categories (Table 2) were identified in this theme: uncertainty and unpredictability of long-term  
14  
15 194 outcomes; responsibility; unwillingness of patients to participate in decision making; physicians prioritize medical  
16  
17 195 facets; trust in patients and families; physicians fear a loss of control; time; and 'acting in a treatment mode' in  
18  
19 196 the case of acute or long-term admissions.  
20

21 197

22  
23 198 When asked about ICU decision-making and SDM, ICU physicians gravitated towards discussing examples of  
24  
25 199 decisions about end-of-life and stopping treatment. ICU physicians described the uncertainty about long-term  
26  
27 200 health outcomes as one of the main struggles they experienced. They cited literary or anecdotal evidence about  
28  
29 201 unexpected outcomes as a reason for struggling with ICU decision making, such as a patient's satisfaction with  
30  
31 202 life after losing the ability to walk where they expressed only sorrow at first. They cited feeling the weight of this  
32  
33 203 responsibility when dealing with conflicts with nursing staff about continuing or ending treatment. According to  
34  
35 204 the ICU physicians, these conflicts mainly arise over complex, long-stay patients. While they sometimes were  
36  
37 205 uncertain about continuing treatment themselves, earlier experiences with success stories kept them cautious.  
38  
39 206 They expressed a need for more long-term data on survival and quality of life after ICU treatment.  
40

41  
42 207 Physicians described variety among their colleagues about starting discussions around treatment wishes and  
43  
44 208 patient needs, with some expressing doing so in the majority of patients, while others thought that doing this  
45  
46 209 more sparingly was sufficient. Several barriers to explore the wishes and needs of patients were discussed. ICU  
47  
48 210 physicians mentioned experiences with patients and families who did not want to involve themselves in the  
49  
50 211 medical decision-making process. Also reported by clinicians and former patients and families was a varying  
51  
52 212 degree of prioritization of medical facets in discussions by physicians leading to less attention for 'softer' topics,  
53  
54 213 such as quality of life. Some physicians described that these factors often did not come into play unless the  
55  
56 214 patient's chances of recovery become low. Moreover, physicians applied their own ideas about what constitutes  
57  
58 215 a good quality of life, while not spending enough time clarifying if a certain patient agreed with their  
59  
60 216 interpretation of a good quality of life. ICU physicians also described doubting wishes expressed by patients and

1  
2  
3 217 their families, again citing literary evidence and anecdotal experiences with patients changing their mind. They  
4  
5 218 expressed doubts about whether patients and families could actually grasp what certain decision in the ICU could  
6  
7 219 lead to in future. They feared that having families be too involved in ICU decision-making would lead to more  
8  
9 220 medically pointless treatment.  
10  
11 221 Furthermore, the acute setting of the ICU was cited as a struggle in the decision-making process, with the general  
12  
13 222 rush cited as a barrier. A 'treatment mode' was described as a rush-driven attitude where physicians do not take  
14  
15 223 enough time to assess whether treatment is still in line with patients' best interests or wishes.  
16  
17  
18  
19  
20  
21  
22  
23  
24  
25  
26  
27  
28  
29  
30  
31  
32  
33  
34  
35  
36  
37  
38  
39  
40  
41  
42  
43  
44  
45  
46  
47  
48  
49  
50  
51  
52  
53  
54  
55  
56  
57  
58  
59  
60

For peer review only

224 Table 2. Theme 1: Categories pertaining to struggles of ICU physicians

| Category                                                                 | Codes                                                                                                                                                                                                                                                                                                              | Quote                                                                                                                                                                                                                                                                                                                                                                                                                                                                                                                                                                                                                                                                                                                                                        |
|--------------------------------------------------------------------------|--------------------------------------------------------------------------------------------------------------------------------------------------------------------------------------------------------------------------------------------------------------------------------------------------------------------|--------------------------------------------------------------------------------------------------------------------------------------------------------------------------------------------------------------------------------------------------------------------------------------------------------------------------------------------------------------------------------------------------------------------------------------------------------------------------------------------------------------------------------------------------------------------------------------------------------------------------------------------------------------------------------------------------------------------------------------------------------------|
| Uncertainty, interpretability and unpredictability of long-term outcomes | Lack of long-term outcome information; More long-term outcome knowledge causes you to stop treatment sooner; Long-term uncertainty limits conversations about continuing treatment                                                                                                                                 | Physician (P): "Overall I think there is an understandable tendency to postpone [decision making about] problems. [...] Again, the problem is always that uncertainty. The other day we lost a patient after 6 weeks of treatment. [...] On the one hand you can say that we all saw that coming. On the other hand – well, you only know for certain if you've tried it."                                                                                                                                                                                                                                                                                                                                                                                   |
| Responsibility                                                           | ICU physicians have final responsibility; Physician determines treatment plan; Stopping treatment is always an option down the line                                                                                                                                                                                | P: "Look, eventually we are the ones that have to bring the message to the family when we stop treatment ... and that is our responsibility. So for a nurse it is easier to question whether we should continue, whereas we really need to do so based on good and substantial arguments."                                                                                                                                                                                                                                                                                                                                                                                                                                                                   |
| Unwillingness of patients to participate in decision making              | Certain types of patients don't want to be involved in decision making; Older patients; Family members hold back                                                                                                                                                                                                   | P: "[...]especially older people say: no, you've studied for this – I don't know, you tell me. They just put everything back in your hands. You want to have those people decide for themselves but they're not going to."                                                                                                                                                                                                                                                                                                                                                                                                                                                                                                                                   |
| Physicians prioritize medical facets                                     | Conversations about continuing treatment are difficult when patients are doing badly; Quality of life is a 'soft' topic; Medical point of view takes precedence; Quality of life not a standard part of multidisciplinary discussions; ICU patients' needs center around communication and (non-medical) treatment | P: "Look, in the end we all prefer talking about the fluid balance and CRP levels. That's the truth. So [talking about quality of life] is 'soft' drivel to many people."<br>P: "Of course everyone will agree that [a patient's biography] is an important topic, but it will often end up last in discussions. I think that the medical side, prognosis, chance of improvement, what are possibilities or alternatives, etc. is always first. These things don't come up until you start wondering if [continuing treatment is still proportional]."<br>Former patients and their families (PF): "[patient with very long admission] I've often called it prison. Everything was decided for me. The theme of my illness was losing all sense of control." |
| Trust in patients and families                                           | Physicians use own interpretation of what constitutes good quality of life; Physicians do not always trust that patients and families know what they want; Physicians know patients can change their minds; Well-informed patients make different choices                                                          | P: "What I used to see, and still see a bit – is that we physicians have our own opinions about what constitutes a good quality of life – in other words, what a good outcome looks like. And we do not look at the patient well enough."<br>P: "Things like what would they have wanted, right – [...] we know that it's proven in literature that people who did not want a certain situation, that when it actually happened to them, they were happy with that outcome [...]. So that information – 'he would never have wanted to end                                                                                                                                                                                                                   |

|                                                                                                    |                                                                                                                                                                |                                                                                                                                                                                                                                                                                                                                                                                                                                                                                                                                                                                                                                                                                                                                                                                                           |
|----------------------------------------------------------------------------------------------------|----------------------------------------------------------------------------------------------------------------------------------------------------------------|-----------------------------------------------------------------------------------------------------------------------------------------------------------------------------------------------------------------------------------------------------------------------------------------------------------------------------------------------------------------------------------------------------------------------------------------------------------------------------------------------------------------------------------------------------------------------------------------------------------------------------------------------------------------------------------------------------------------------------------------------------------------------------------------------------------|
|                                                                                                    |                                                                                                                                                                | up in a wheelchair' or 'he would never have wanted to be dependent', when it happens to you, we are apparently flexible enough in our behaviors and emotions, that we eventually can be very happy, and very happy to be alive. So that information has limited value".                                                                                                                                                                                                                                                                                                                                                                                                                                                                                                                                   |
| Physicians fear a loss of control                                                                  | Family or patient wants to continue treatment disproportionately; ICU physicians have final responsibility                                                     | P: "[On reasons other physicians might not ask a patient or family's wishes] Not wanting to be surprised with things you might not be able to do. That you're scared of promising something you can't fulfill. It's weird to then not ask the question, but that is a way of doing things. Or fearing totally irrational wishes from people."                                                                                                                                                                                                                                                                                                                                                                                                                                                             |
| Time                                                                                               | Admission rush or other time constraints limit conversations about treatment wishes                                                                            | P: "The limits are mostly put on by time and space. Sometimes you have a really busy day so you don't have time for it. Then you need to cut back a little on those conversations, because there isn't any time."                                                                                                                                                                                                                                                                                                                                                                                                                                                                                                                                                                                         |
| 'Treatment mode' in acute settings                                                                 | Treatment mode limits conversations about treatment wishes; Stopping treatment is always an option down the line; To admit at all or to discontinue treatment; | P: "At the same time it's easier for me to intubate, [...] to start renal replacement therapy – far easier than not starting treatment. So I think that's an important point. [...] Sometimes we use the multidisciplinary discussion to say to each other: are we really still on the right track? [...] And then you sometimes get one-liners like: 'You can always stop [treatment], the patient can always say that they don't want it like this [at a later stage]."<br>P: "I'm convinced that people have an interest in being told there is a chance of an unfortunate outcome. [...] I think it's also to do with that many physicians, due to their nature, are in 'treatment mode', and principally still want to treat. Stopping treatment is not a standard reflex of the average physician." |
| Abbreviations: N = ICU Nurse, P = ICU physician, PF = Former ICU patients and their family members |                                                                                                                                                                |                                                                                                                                                                                                                                                                                                                                                                                                                                                                                                                                                                                                                                                                                                                                                                                                           |

225



1  
2  
3 226 **Theme II: Needs of former patients and family members**  
4

5 227 Four categories (Table 3) were identified within this theme, including: a holistic approach; feeling included in the  
6  
7 228 medical process and knowing what's coming; information about long-term outcomes; and communication  
8  
9 229 between medical staff and patients and families.

10  
11 230 Former ICU patients and their families described an overwhelming satisfaction with medical care. Their needs  
12  
13 231 centred around how they remembered being treated in a broader sense. They reported sometimes struggling  
14  
15 232 with lingering feelings and memories. Some recalled feeling seen as a condition rather than a human being, which  
16  
17 233 caused them to feel helpless during their stay.

18  
19 234 While some had no additional needs with regards to their part in the ICU decision-making process, others' needs  
20  
21 235 focused on two areas: being made to feel included in everyday decisions, and being better prepared for their  
22  
23 236 recovery post-ICU.

24  
25 237 Former patients also reported a sense of lack of control about their ICU care. They expressed that this might have  
26  
27 238 been different if they had felt more included in the decision-making process by being explained why things were  
28  
29 239 being done to them. Especially during longer stays they cited a frustration with their sense of lack of control  
30  
31 240 regarding their schedule in the ICU that they did not experience once leaving the ICU. Some felt that more  
32  
33 241 integration between the medical and 'human' side was needed. For example, being explained exactly why  
34  
35 242 inserting a catheter was necessary instead of feeling like the insertion was a foregone conclusion. They cited that  
36  
37 243 *feeling* heard and included was the most important factor, rather than having an equal hand in every and all  
38  
39 244 decisions.

40  
41 245 Moreover, they described that the long road to recovery post-ICU was sometimes unexpected and they  
42  
43 246 expressed a need for more information. This did not only pertain to physical recovery, but to mental health and  
44  
45 247 emotional recovery and issues regarding returning to the workforce as well. They described different levels of  
46  
47 248 received aftercare post-ICU, and the difference it had made to their recovery.  
48  
49  
50  
51  
52  
53  
54  
55  
56  
57  
58  
59  
60

249 *Table 3. Theme II: Categories pertaining to the needs of former ICU patients and their close family members*

| Categories                                                       | Codes                                                                                                                                                                                            | Quotes                                                                                                                                                                                                                                                                                                                                                                                                                                                                                                                                                                                               |
|------------------------------------------------------------------|--------------------------------------------------------------------------------------------------------------------------------------------------------------------------------------------------|------------------------------------------------------------------------------------------------------------------------------------------------------------------------------------------------------------------------------------------------------------------------------------------------------------------------------------------------------------------------------------------------------------------------------------------------------------------------------------------------------------------------------------------------------------------------------------------------------|
| A holistic approach                                              | ICU patients' needs center around communication and (non-medical) treatment; Little attention for the human behind the condition; Physician coming to sit next to you to ask you how you are     | PF: "Treating me as a human being instead of a patient with some mystery illness – yes, I would have appreciated that very much, especially now looking back."<br>PF: "Being nicer to you. I've heard it from many patients. There are very little things someone does when maybe having a bad day at work, but for a patient in such a situation – that's not normal for you. So those are things that you remember months later, while the nurse probably doesn't think about it at all."                                                                                                          |
| Feeling included in the process and knowing what's coming        | Communication needs: knowing what's coming; Conversations about shared decision making are physician-driven; Patients and families lack a feeling of control                                     | PF: "Well, it all happens to you. I think that happens a lot in the ICU, because most of the time things aren't planned, so things happen. [...] But if you wanted to optimize it, in my experience, you can tell people: what are you doing, why are you doing it. Even if people are half-conscious, you don't know what they will remember. I think they are very much in a 'state of doing'."                                                                                                                                                                                                    |
| Communication between medical staff and patients and families    | ICU patients' needs center around communication and (non-medical) treatment; Patients and families lack a feeling of control; No attention for the family                                        | PF: "I've noticed that the physicians mainly focus on getting better, while you're still in a completely different phase. Coordinating those views, I think that's very healthy. The medical part – they have to decide and give you choices and options, but the human part you have to coordinate together because otherwise I won't understand your decision at all. [...] And at some point you think: well, whatever, do it, but if you don't agree mentally and you feel so weak – I don't think that's good for your physical recovery."                                                      |
| Information about long-term outcomes                             | Needs for long-term information; Information regarding recovery; Answers to standing questions; Well informed patients decide differently; Better information provision leads to better outcomes | PF: "My feeling about the ICU is – the onus is on quick action, and survival. But then there is a long road afterwards and I think there should be more attention to that. Like a conversation with the partner, or whoever, someone close to the patient to say: what is important for the patient down the line?"<br>PF: "Now I've noticed that the better the aftercare, the better your recovery."<br>PF: "Afterwards it's worse, it seems like. Then it really gets through to you how bad it could have been – and then immediately how good it has been that you've managed to prevent that." |
| Abbreviations: PF = Former ICU patients and their family members |                                                                                                                                                                                                  |                                                                                                                                                                                                                                                                                                                                                                                                                                                                                                                                                                                                      |

250

251

1  
2  
3 253 ***Theme III: The Role of ICU nurses***  
4

5 254 Four categories were identified within this theme: the role of the ICU nurse being a liaison and translator  
6  
7 255 between the physician and the patient and their family; questioning ICU physician's decisions to continue  
8  
9 256 treatment; difficulties in communication between physicians and nurses; and offering non-medical information  
10  
11 257 to complement ICU decision-making.

12  
13 258 Within ICU decision-making, ICU nurses were generally focused on their communication with ICU physicians.  
14  
15 259 They described functioning as a liaison between ICU physicians and patients and their families, mainly due to  
16  
17 260 their continuous presence at the bedside. Both physicians and nurses described the role of the nurse as an  
18  
19 261 advocate for the social context and needs of patients and their families to physicians, as well as a translator of  
20  
21 262 the sometimes difficult medical 'speak' of physicians. Some nurses reported that they used this role to  
22  
23 263 compensate for the variety in physician communication skills with patients and families.

24  
25 264 Nurses reported being able to provide context for physicians to incorporate in medical decision-making by giving  
26  
27 265 their insights in the patient and family situation. They generally felt listened to, even if their more holistic points  
28  
29 266 of view were not always incorporated in the eventual medical decision, depending on the ICU physician on call.  
30  
31 267 However, in non-complex, everyday cases, they were generally not troubled by this. They noted difficulties in  
32  
33 268 communication between their two professions depending wholly on the various types of physician and nurse.  
34  
35 269 Assertive nurses made sure their voices were heard, but acknowledged that not all of their colleagues have this  
36  
37 270 capability.

38  
39 271 Conflicts arose in situations of complex patient cases being in the ICU for a prolonged period of time. The ICU  
40  
41 272 nurse study participants, when asked about ICU decision-making and SDM, gravitated towards discussing these  
42  
43 273 struggles, which predominantly centred around continuing or ending treatment, with physicians oftentimes  
44  
45 274 advocating for the former, while nurses want the latter. They felt this was mostly due to being more affected by  
46  
47 275 complex, poignant cases, due to their continuous presence at the bedside. Within this context they reported  
48  
49 276 feeling not being taken seriously and feeling blindsided by decisions being made in multidisciplinary meetings  
50  
51 277 dominated by physicians. They felt frustrated with the returning nature of this type of conflict. They urged  
52  
53 278 bridging the gap between physicians and nurses through team-building, moral deliberation and sharing  
54  
55 279 vulnerabilities about treatment doubts.

56  
57  
58 280  
59  
60 281

282 Table 4. Theme III: Categories pertaining to the role of ICU nurses

| Categories                                                       | Codes                                                                                                                                                                                                                                                         | Quotes                                                                                                                                                                                                                                                                                                                                                                                                                                                                                                                                                                                                                                                                                                                                                                                                                                                                                                                        |
|------------------------------------------------------------------|---------------------------------------------------------------------------------------------------------------------------------------------------------------------------------------------------------------------------------------------------------------|-------------------------------------------------------------------------------------------------------------------------------------------------------------------------------------------------------------------------------------------------------------------------------------------------------------------------------------------------------------------------------------------------------------------------------------------------------------------------------------------------------------------------------------------------------------------------------------------------------------------------------------------------------------------------------------------------------------------------------------------------------------------------------------------------------------------------------------------------------------------------------------------------------------------------------|
| Liaison and translator between physician, and patient and family | Nurse is eyes and ears of the physician; Nurse translates medical world for patient; Nurse makes sure information is clear after a family conference; Sharing vulnerabilities can improve communication between clinicians                                    | ICU Nurse (N): "Then after the family conference, you let it sink in, and you start repeating it and repeating it. And you try to use the same words as the physician – because I've noticed families say: I think it's so difficult, one says this and the others says this – but that's because [families] don't understand."<br>P: "What kind of support we need, how the family is doing, how the patient is doing, sleeping, pain – there are a lot of things they have a lot of insight about, yes."<br>P: "Where I see the nurse is [...] as a translator of what the patient was like at home, who are they, what type of person were they, what is their social safety net like [...]. That information is very valuable [...]. So I think that their added value is in the clarification of the social context."<br>N: "That is kind of the role we take on: [translating the family's wishes for the physicians.]" |
| Incorporating non-medical information in ICU decision-making     | Nurse provides social and empathetic point of view; ICU nurse is at bedside for 24 hours a day; Talking about it when something doesn't feel right; Nurse participation in conversation depends on how assertive they are                                     | N: "Yes – [nurses] think it's important to be of value in decision moments. Continuing or not, you know. Of course you need to do so based on medical information, but also based on the holistic view, and I think we should play a larger part in that, because we also know the family really well."<br>N: "I think generally it is a very medically-focused decision-making process in which the nurse is heard and listened to [...] but I don't think we have that big of a share in the eventual decision."                                                                                                                                                                                                                                                                                                                                                                                                            |
| Difficulties in communication between physicians and nurses      | Cooperation with nurses;<br>Discrepancy of opinion between ICU physicians and nurses regarding end-of-life care for complicated cases;<br>Nurse doesn't feel welcome in multidisciplinary meeting;<br>ICU nurse feels like they are not being taken seriously | P: "There are nurses that are well spoken and they'll tell you their stuff. They are there, but they are a minority. Plus, they won't always say it to everyone, because they know some [physicians] won't listen."<br>N: "Then the next day there was a new [intensivist] that didn't know the patient, but I had been at the bedside the entire day, so I told them [what the previous intensivist and I had decided]. [Then they said:] 'Well, that wasn't communicated with me, I don't agree with you, we won't do it'. So then you're not heard."                                                                                                                                                                                                                                                                                                                                                                       |

1  
2  
3  
4  
5  
6  
7  
8  
9  
10  
11  
12  
13  
14  
15  
16  
17  
18  
19  
20  
21  
22  
23  
24  
25  
26  
27  
28  
29  
30  
31  
32  
33  
34  
35  
36  
37  
38  
39  
40  
41  
42  
43  
44  
45  
46

|                                                        |                                                                                                                                                                                                   |                                                                                                                                                                                                                                                                                                                                                                                                                                                                      |
|--------------------------------------------------------|---------------------------------------------------------------------------------------------------------------------------------------------------------------------------------------------------|----------------------------------------------------------------------------------------------------------------------------------------------------------------------------------------------------------------------------------------------------------------------------------------------------------------------------------------------------------------------------------------------------------------------------------------------------------------------|
| Questioning physician’s decision to continue treatment | Conflict arises around complex patients who are at the ICU for a long time; Medical point-of-view takes precedence; Whether nurse’s point-of-view is heard depends on which physician is on shift | <p>N: “We often feel that when the patient is there for a very long time, and we see them deteriorating – the physicians often think: we can try this and we should approach them, maybe they know something – and then we think: should we do all of this?”</p> <p>N: “I think: there are limits. Sometimes it’s enough. If you’ve done everything – you shouldn’t stop based on emotions [...] but other times I think: [recovery]’s just not going to happen.</p> |
| Abbreviations: N = ICU Nurse, P = ICU physician        |                                                                                                                                                                                                   |                                                                                                                                                                                                                                                                                                                                                                                                                                                                      |

For peer review only

1  
2  
3 284 *Similarities and differences between stakeholder groups*  
4

5 285 Overall, barriers to and struggles with implementing SDM in critical care practice were highlighted by both ICU  
6  
7 286 physicians and ICU nurses. They shared a focus on end-of-life decision making as the main decision in which SDM  
8  
9 287 should be executed. They cited the practical difficulties surrounding end-of-life decision making, the formal  
10  
11 288 necessities for SDM and their role in it. Clinicians differed when speaking about each other. ICU nurses were very  
12  
13 289 focused on the mediating role and influence of the ICU physician and the level in which ICU nurses are invited  
14  
15 290 and able to participate in the SDM process. ICU physicians spoke mostly about the responsibility they felt in  
16  
17 291 imparting the correct information to patients and family members, and appeared to not view patients and family  
18  
19 292 members as equal partners in the SDM process.

20  
21 293 Patients and their family members offered a different perspective on incorporating SDM. If they had unmet  
22  
23 294 needs, these were mainly focused on wanting a more holistic approach characterized by an open style of  
24  
25 295 communication wherein they continuously feel part of the decision-making process, albeit not at the helm  
26  
27 296 (Figure 1).

28  
29 297 There were several similarities shared across the three stakeholder groups. The results indicated a shared need  
30  
31 298 for more long-term outcome information that could guide both ICU decision-making and help manage future  
32  
33 299 expectations. There was a desire for a more holistic integration of both medical information, as well as contextual  
34  
35 300 information about the patient, such as their quality of life. This is interesting when considering ICU nurses' role  
36  
37 301 as, translators, liaisons and advocates for patients' needs. Lastly, many of the needs surrounding SDM had a  
38  
39 302 communicative nature.

40  
41  
42 303

43  
44 *Figure 1. ICU physicians mainly spoke of struggles with implementing SDM in the ICU, while patients and*  
45 *families elaborated on their needs, and ICU nurses talked about how their current role in the ICU decision-*  
46 *making process could be improved.*  
47

48 304

49 305

50 306

51 307

52 308

53 309

54  
55  
56  
57  
58  
59  
60 310 **Discussion**

1  
2  
3 311 This qualitative interview study explored the views, experiences, and needs for SDM in the ICU experienced by  
4  
5 312 ICU physicians, nurses and former patients and their family members. Interviewees reported struggles, needs  
6  
7 313 and an elucidation of their current and preferred role in the SDM process in the ICU. The three stakeholder  
8  
9 314 groups shared a need for more long-term outcome information, and a desire for an integration of medical  
10  
11 315 information with contextual information, paired with a more holistic approach. Many of the needs around SDM  
12  
13 316 in the ICU had a communicative nature.

15 317 ICU physicians mainly associated SDM with struggles, such as the uncertainty of the future disease course and  
16  
17 318 feeling pressure because of having final responsibility. They also reported several barriers that prevented them  
18  
19 319 from open communication about wishes of patients or proxies, such as a fear of losing control of the situation.  
20  
21 320 ICU patients and their families reported unmet needs with regards to communication and general (non-medical)  
22  
23 321 treatment, wanting to continuously feel included in the ICU decision-making process, not just during formal  
24  
25 322 meetings. ICU nurses drew a clear picture of their role in the SDM process as a liaison between the physician and  
26  
27 323 patient. They translate medical jargon for patients, and advocate for patients' needs and wishes in the decision-  
28  
29 324 making process. They reported communication struggles with physicians that limited a more balanced decision-  
30  
31 325 making process, in which nurses provide physicians with more information about the wishes and needs of  
32  
33 326 patients.

35 327 Earlier literature into the subject shows a focus on decisions pertaining to end-of-life (15, 31, 37, 38). This decision  
36  
37 328 is sometimes viewed as one of the main and most difficult decisions to be made in the ICU, so much so that  
38  
39 329 clinician interviewees oftentimes presumed it to be the natural focus point of the interview. Consistently, there  
40  
41 330 was a variety of interpretations regarding what SDM in the ICU looked like. This signals a possible need for  
42  
43 331 training and role models (15, 39, 40) to improve both clinician-patient and interprofessional understanding and  
44  
45 332 execution of SDM.

47 333 In earlier literature it is reported that a significant part of patients and family members might not be willing to  
48  
49 334 participate in the decision-making process (41). This was reflected in our sample too: not all interviewees had  
50  
51 335 additional needs with regards to decision-making. The needs that were reported here bear some similarities to  
52  
53 336 literature into patient palliative care preferences: mainly, value-focused care aimed at preserving the patient's  
54  
55 337 sense of personhood (42). An ICU-based study aimed at improving communication between families and  
56  
57 338 physicians has noted the importance of family members feeling involved in informal physician interactions as  
58  
59 339 well as larger formal ones to establish their role in the decision-making process and improve family

1  
2  
3 340 empowerment (43). Patient and family empowerment through information provision and awareness of the  
4  
5 341 presence of choices are necessary ingredients to improve patient involvement in ICU decision-making (44).  
6  
7 342 The findings in this study pertaining to the struggles of physicians confirm findings in earlier studies, especially  
8  
9 343 the difficulties surrounding end-of-life decision-making and the resulting communication struggles between  
10  
11 344 physicians and nurses (14, 31, 45). Clinicians appeared hesitant to surrender control of the decision-making  
12  
13 345 process due to their past experiences, as well a lack of trust in the understanding of the situation exhibited by  
14  
15 346 the patient and family members. The unavailability of long-term outcome information around survival and  
16  
17 347 quality of life was important to their hesitance in starting conversations around decision-making. Though long-  
18  
19 348 term outcome data collection in the ICU has its challenges (46), there is an increase in big data initiatives to tackle  
20  
21 349 the current gaps in knowledge (47). For instance, the collection of daily physiologic variable information has been  
22  
23 350 shown to provide an increased understanding and knowledge about the likelihood of ICU survival (48, 49).  
24  
25 351 Communication struggles reported mainly by the ICU nurses pertaining to decisions to limit treatment have been  
26  
27 352 documented before and appear widespread (50, 51). Nurses have been described to detect any type of ICU  
28  
29 353 conflict quicker than physicians (52), and these conflicts can lead to augmented levels of stress in nurses (53),  
30  
31 354 which may increase the incidence of burn-out among nurses (54). To keep nurses healthy and involved, there is  
32  
33 355 an urgent need for training to improve interprofessional collaboration and communication, perhaps through  
34  
35 356 more frequent moral deliberation meetings (55). As was reported in previous literature, the levels of their  
36  
37 357 involvement in ICU decision-making processes were variable and depended on assertiveness and the type of  
38  
39 358 physician on call (56). It therefore follows that the information about patient context and background cannot  
40  
41 359 always be sufficiently imparted, though research has shown that nurse involvement in ICU decision-making  
42  
43 360 improves both patients' and nurses' satisfaction-of-care (57). To equalize the instances of nurse involvement and  
44  
45 361 provide nurses with a more consistent opportunity to provide their knowledge, it may be beneficial to increase  
46  
47 362 and better define their role during decision-making moments, such as during patient handovers, bedside rounds  
48  
49 363 and multidisciplinary meetings. Earlier literature has indicated that collaborative practice is possible, by, for  
50  
51 364 instance, giving nurses responsibility for providing the physician with day-to-day specific information regarding  
52  
53 365 the patient and signaling when physiological variables are cumulatively out of the normal range, and that it can  
54  
55 366 improve both the clinical outcome as well as the satisfaction levels of ICU clinicians (48, 49, 54, 58-61).  
56  
57  
58 367 To ensure a more complete understanding of the complexities of an ICU stay, general practitioners could play a  
59  
60 368 part in information provision to patients and family members in an environment not yet defined by quick action



1  
2  
3 369 (62), while also being able to provide ICU clinicians with context information about the patient. With the large  
4  
5 370 variety in staff attitude to SDM in the ICU, and the interventions surrounding education, prioritization and  
6  
7 371 resource (re)allocation needed to further implement SDM, the organization at large should play a role in  
8  
9 372 guideline development and setting a work standard involving SDM (63, 64).

10  
11 373 This study offers further elucidation of reasons for the variable levels of uptake of SDM in the ICU. It is a further  
12  
13 374 step towards implementation, paving the way towards a more satisfactory exchange of values between all three  
14  
15 375 stakeholder groups to make preference-based decisions. A strength of this study is the inclusion of all three major  
16  
17 376 stakeholder groups.

18  
19 377 Our study has several limitations. Firstly, despite our decision to focus on ICU survivors, the many struggles  
20  
21 378 surrounding end-of life decisions indicate that this is an important ICU decision-making theme. It may therefore  
22  
23 379 have been better to include family members of deceased ICU patients as well. Furthermore, though our sample  
24  
25 380 size may be regarded as small, the number of interviews in this study is more than the number suggested by  
26  
27 381 Guest et al (65). Also, most of the interviews with ICU physicians and nurses were completed before the  
28  
29 382 interviews with former patients and family members had taken place. Though patient interaction and  
30  
31 383 involvement were discussed in the ICU nurse interviews, this order prevented discussions on more specific  
32  
33 384 findings. However, as the ICU nurses predominantly focused heavily on ICU physicians in their interviews, the  
34  
35 385 impact might be limited. The findings of qualitative research need to be verified for frequency of occurrence in  
36  
37 386 larger samples through questionnaire research. Moreover, our focus on two tertiary centres as the main source  
38  
39 387 of interviewed clinicians, may have skewed the results as decision-making culture may differ between ICUs (12).  
40  
41 388 However, our findings are in accordance with literature as well as with the preparatory data collected from ICU  
42  
43 389 clinicians and former patients and family members at the national patient organization symposium  
44  
45 390 (Supplementary material 2). Lastly, views and articulations of experiences are influenced by culture. More  
46  
47 391 studies concerning all three main stakeholder groups from different cultures can be a way of elucidating whether  
48  
49 392 the concepts described here are universal or if there are more or different themes.

50  
51 393  
52  
53 394 Though ascertainment of the frequency of these findings might be necessary, the similarities of these results to  
54  
55 395 the literature and preliminary data collection embolden us to say that to further improve SDM implementation  
56  
57 396 there is a need for:

- 1  
2  
3 397 • A more continuous role of patients and family members in ICU decision-making, as individually desired  
4  
5 398 and ascertained  
6  
7 399 • Long-term, specific outcome information about survival and quality of life to support SDM discussions  
8  
9 400 • A more substantial role for the ICU nurse to ensure their imparting of knowledge about patient context  
10  
11 401 and background during handover meetings, bedside rounds and the multidisciplinary meetings  
12  
13 402 • Interventions to improve communication between the three stakeholder groups, such as moral  
14  
15 403 deliberation, interprofessional collaboration, and the involvement of the general practitioner  
16  
17 404  
18  
19 405  
20  
21 406  
22  
23 407  
24  
25 408  
26  
27 409  
28  
29 410  
30  
31 411  
32  
33 412  
34  
35 413  
36  
37 414  
38  
39 415  
40  
41 416  
42  
43 417  
44  
45 418  
46  
47 419  
48  
49 420  
50  
51 421  
52  
53 422  
54  
55

## 56 423 **Conclusions**

57  
58 424 In the ICU, necessary steps should be taken to implement SDM in a way that satisfies physicians, nurses and  
59  
60 425 patients and their family members. This study gives several recommendations to ensure that all three

1  
2  
3 426 stakeholder groups can fulfill their role in the SDM process. All in all, there is an essential need for more long-  
4  
5 427 term health outcomes, a more informal inclusion of patients and their family members role in decision-making  
6  
7 428 processes, and a more substantial role for the ICU nurse to systematically integrate patients' values and needs  
8  
9 429 in the decision-making process. There is a need for interventions that tackle the communication struggles  
10  
11 430 between the three stakeholder groups.

12  
13 431

14  
15 432

16  
17 433

18  
19 434

20  
21 435

22  
23 436

24  
25 437

26  
27 438

28  
29 439

30  
31 440

32  
33 441

34  
35 442

36  
37 443

38  
39 444

40  
41 445

42  
43 446

44  
45 447

46  
47 448

48  
49 449

50  
51 450

52  
53 451

54  
55  
56 452 **Declarations**

57  
58 453 *Competing interests*

59  
60 454 The authors declare that they have no competing interests.

1  
2  
3 455 *Funding*

4  
5 456 This work was supported by Zorginstituut Nederland to last author Dr. Marieke Zegers (2018026879).

6  
7 457 Zorginstituut Nederland was not involved in the design of the study, nor with the data collection, analysis,  
8  
9 458 interpretation or writing of the manuscript.

10  
11 459 *Authors' contributions*

12  
13 460 NW, MvDB, HvdH and MZ contributed substantially to the conception of the work. Each author contributed  
14  
15 461 substantially to the design of the work. NW, MvDB and MZ contributed substantially to the acquisition and  
16  
17 462 analysis of the data. Each author contributed substantially to the interpretation of the data. NW drafted the  
18  
19 463 manuscript. Each author contributed substantially to the revision of the work.

20  
21  
22 464 Each author approved the submitted version. Each author agrees to be personally accountable for the author's  
23  
24 465 own contributions and to ensure that questions related to the accuracy or integrity of any part of the work,  
25  
26 466 even ones in which the author was not personally involved, are appropriately investigated, resolved, and the  
27  
28 467 resolution documented in the literature.

29  
30  
31  
32 468 *Availability of data and materials*

33  
34 469 The data used and/or analysed during the current study are available from the corresponding author on  
35  
36 470 reasonable request.

37  
38 471 *Acknowledgements*

39  
40 472 We would like to thank the Dutch ICU patient organization (FCIC) for their knowledge and help.

41  
42  
43 473 *Word count*

44  
45 474 4282

46  
47 475

48  
49  
50 476

51  
52  
53 477

54  
55  
56 478 **References**

1  
2  
3  
4  
5  
6  
7  
8  
9  
10  
11  
12  
13  
14  
15  
16  
17  
18  
19  
20  
21  
22  
23  
24  
25  
26  
27  
28  
29  
30  
31  
32  
33  
34  
35  
36  
37  
38  
39  
40  
41  
42  
43  
44  
45  
46  
47  
48  
49  
50  
51  
52  
53  
54  
55  
56  
57  
58  
59  
60

- 479 1. Davidson JE, Aslakson RA, Long AC, Puntillo KA, Kross EK, Hart J, et al. Guidelines for Family-Centered Care in the Neonatal, Pediatric, and Adult ICU. *Crit Care Med*. 2017;45(1):103-28.
- 480 2. Kon AA, Davidson JE, Morrison W, Danis M, White DB. Shared Decision Making in ICUs: An American College of Critical Care Medicine and American Thoracic Society Policy Statement. *Crit Care Med*. 2016;44(1):188-201.
- 481 3. Seeber AA, Pols AJ, Hijdra A, Willems DL. How Dutch neurologists involve families of critically ill patients in end-of-life care and decision-making. *Neurol Clin Pract*. 2015;5(1):50-7.
- 482 4. Lautrette A, Peigne V, Watts J, Souweine B, Azoulay E. Surrogate decision makers for incompetent ICU patients: a European perspective. *Curr Opin Crit Care*. 2008;14(6):714-9.
- 483 5. Michalsen A, Long AC, DeKeyser Ganz F, White DB, Jensen HI, Metaxa V, et al. Interprofessional Shared Decision-Making in the ICU: A Systematic Review and Recommendations From an Expert Panel. *Crit Care Med*. 2019;47(9):1258-66.
- 484 6. Detsky ME, Harhay MO, Bayard DF, Delman AM, Buehler AE, Kent SA, et al. Discriminative Accuracy of Physician and Nurse Predictions for Survival and Functional Outcomes 6 Months After an ICU Admission. *Jama*. 2017;317(21):2187-95.
- 485 7. Jensen HI, Ammentorp J, Ording H. Guidelines for withholding and withdrawing therapy in the ICU: impact on decision-making process and interdisciplinary collaboration. *Heart Lung Vessel*. 2013;5(3):158-67.
- 486 8. Bruce CR, Miller SM, Zimmerman JL. A qualitative study exploring moral distress in the ICU team: the importance of unit functionality and intrateam dynamics. *Crit Care Med*. 2015;43(4):823-31.
- 487 9. Van den Bulcke B, Vyt A, Vanheule S, Hoste E, Decruyenaere J, Benoit D. The perceived quality of interprofessional teamwork in an intensive care unit: A single centre intervention study. *J Interprof Care*. 2016;30(3):301-8.
- 488 10. Shay LA, Lafata JE. Where is the evidence? A systematic review of shared decision making and patient outcomes. *Med Decis Making*. 2015;35(1):114-31.
- 489 11. Wieringa TH, Rodriguez-Gutierrez R, Spencer-Bonilla G, de Wit M, Ponce OJ, Sanchez-Herrera MF, et al. Decision aids that facilitate elements of shared decision making in chronic illnesses: a systematic review. *Syst Rev*. 2019;8(1):121.
- 490 12. Hart JL, Harhay MO, Gabler NB, Ratcliffe SJ, Quill CM, Halpern SD. Variability Among US Intensive Care Units in Managing the Care of Patients Admitted With Preexisting Limits on Life-Sustaining Therapies. *JAMA Internal Medicine*. 2015;175(6):1019-26.
- 491 13. McKenzie MS, Auriemma CL, Olenik J, Cooney E, Gabler NB, Halpern SD. An Observational Study of Decision Making by Medical Intensivists. *Critical Care Medicine*. 2015;43(8):1660-8.
- 492 14. Scheunemann LP, Ernecoff NC, Buddadhumaruk P, Carson SS, Hough CL, Curtis JR, et al. Clinician-Family Communication About Patients' Values and Preferences in Intensive Care Units. *JAMA Intern Med*. 2019;179(5):676-84.
- 493 15. Vasher ST, Oppenheim IM, Sharma Basyal P, Lee EM, Hayes MM, Turnbull AE. Physician Self-assessment of Shared Decision-making in Simulated Intensive Care Unit Family Meetings. *JAMA Netw Open*. 2020;3(5):e205188.
- 494 16. Anstey MH, Litton E, Jha N, Trevenen ML, Webb S, Mitchell IA. A comparison of the opinions of intensive care unit staff and family members of the treatment intensity received by patients admitted to an intensive care unit: A multicentre survey. *Aust Crit Care*. 2019;32(5):378-82.
- 495 17. Beeby JP. Intensive care nurses' experiences of caring. Part 2: Research findings. *Intensive Crit Care Nurs*. 2000;16(3):151-63.
- 496 18. Gustafson A. Reducing Patient Uncertainty: Implementation of a Shared Decision-Making Process Enhances Treatment Quality and Provider Communication. *Clin J Oncol Nurs*. 2017;21(1):113-5.
- 497 19. Bibas L, Peretz-Larochelle M, Adhikari NK, Goldfarb MJ, Luk A, Englesakis M, et al. Association of Surrogate Decision-making Interventions for Critically Ill Adults With Patient, Family, and Resource Use Outcomes: A Systematic Review and Meta-analysis. *JAMA Netw Open*. 2019;2(7):e197229.
- 498 20. Verharen L, Mintjes J, Kaljouw M, Melief W, Schilder L, van der Laan G. Psychosocial Needs of Relatives of Trauma Patients. *Health Soc Work*. 2015;40(3):233-8.

- 531 21. Gross J, Williams B, Fade P, Brett SJ. Intensive care: balancing risk and benefit to facilitate  
532 informed decisions. *Bmj*. 2018;363:k4135.
- 533 22. Gustin AN, Jr. Shared Decision-Making. *Anesthesiol Clin*. 2019;37(3):573-80.
- 534 23. Ozdemir S, Finkelstein EA. Cognitive Bias: The Downside of Shared Decision Making. *JCO Clin  
535 Cancer Inform*. 2018;2:1-10.
- 536 24. White DB, Angus DC, Shields AM, Buddadhumaruk P, Pidro C, Paner C, et al. A Randomized  
537 Trial of a Family-Support Intervention in Intensive Care Units. *N Engl J Med*. 2018;378(25):2365-75.
- 538 25. Fried TR. Communication About Treatment Options and Shared Decision Making in the  
539 Intensive Care Unit. *JAMA Intern Med*. 2019;179(5):684-5.
- 540 26. Curtis JR, Tonelli MR. Shared decision-making in the ICU: value, challenges, and limitations. *Am  
541 J Respir Crit Care Med*. 2011;183(7):840-1.
- 542 27. Olding M, McMillan SE, Reeves S, Schmitt MH, Puntillo K, Kitto S. Patient and family  
543 involvement in adult critical and intensive care settings: a scoping review. *Health Expect*.  
544 2016;19(6):1183-202.
- 545 28. Tong A, Sainsbury P, Craig J. Consolidated criteria for reporting qualitative research (COREQ):  
546 a 32-item checklist for interviews and focus groups. *Int J Qual Health Care*. 2007;19(6):349-57.
- 547 29. Cypress BS. Family Conference in the Intensive Care Unit: A Systematic Review. *Dimensions of  
548 Critical Care Nursing*. 2011;30(5):246-55.
- 549 30. Needham DM, Davidson J, Cohen H, Hopkins RO, Weinert C, Wunsch H, et al. Improving long-  
550 term outcomes after discharge from intensive care unit: report from a stakeholders' conference. *Crit  
551 Care Med*. 2012;40(2):502-9.
- 552 31. Brooks LA, Manias E, Nicholson P. Communication and Decision-Making About End-of-Life Care  
553 in the Intensive Care Unit. *Am J Crit Care*. 2017;26(4):336-41.
- 554 32. Mehter HM, McCannon JB, Clark JA, Wiener RS. Physician Approaches to Conflict with Families  
555 Surrounding End-of-Life Decision-making in the Intensive Care Unit. A Qualitative Study. *Ann Am  
556 Thorac Soc*. 2018;15(2):241-9.
- 557 33. Martins Pereira S, Fradique E, Hernández-Marrero P. End-of-Life Decision Making in Palliative  
558 Care and Recommendations of the Council of Europe: Qualitative Secondary Analysis of Interviews and  
559 Observation Field Notes. *J Palliat Med*. 2018;21(5):604-15.
- 560 34. Visser M, Deliens L, Houttekier D. Physician-related barriers to communication and patient-  
561 and family-centred decision-making towards the end of life in intensive care: a systematic review. *Crit  
562 Care*. 2014;18(6):604.
- 563 35. Pope C, Ziebland S, Mays N. Qualitative research in health care. Analysing qualitative data. *Bmj*.  
564 2000;320(7227):114-6.
- 565 36. Chapman AL, Hadfield M, Chapman CJ. Qualitative research in healthcare: an introduction to  
566 grounded theory using thematic analysis. *J R Coll Physicians Edinb*. 2015;45(3):201-5.
- 567 37. Lautrette A, Darmon M, Megarbane B, Joly LM, Chevret S, Adrie C, et al. A communication  
568 strategy and brochure for relatives of patients dying in the ICU. *N Engl J Med*. 2007;356(5):469-78.
- 569 38. White DB, Braddock CH, 3rd, Berecknyei S, Curtis JR. Toward shared decision making at the end  
570 of life in intensive care units: opportunities for improvement. *Arch Intern Med*. 2007;167(5):461-7.
- 571 39. Oerlemans AJM, Knippenberg ML, Olthuis GJ. Learning shared decision-making in clinical  
572 practice. *Patient Educ Couns*. 2020.
- 573 40. Lorin S, Rho L, Wisnivesky JP, Nierman DM. Improving medical student intensive care unit  
574 communication skills: a novel educational initiative using standardized family members. *Crit Care Med*.  
575 2006;34(9):2386-91.
- 576 41. Azoulay É, Pochard F, Chevret S, Adrie C, Annane D, Bleichner G, et al. Half the family members  
577 of intensive care unit patients do not want to share in the decision-making process: A study in 78  
578 French intensive care units\*. *Critical Care Medicine*. 2004;32(9):1832-8.
- 579 42. Nelson JE, Puntillo KA, Pronovost PJ, Walker AS, McAdam JL, Ilaoa D, et al. In their own words:  
580 patients and families define high-quality palliative care in the intensive care unit. *Crit Care Med*.  
581 2010;38(3):808-18.

- 1  
2  
3 582 43. Kalocsai C, Amaral A, Piquette D, Walter G, Dev SP, Taylor P, et al. "It's better to have three  
4 583 brains working instead of one": a qualitative study of building therapeutic alliance with family  
5 584 members of critically ill patients. *BMC Health Serv Res.* 2018;18(1):533.
- 6 585 44. Joseph-Williams N, Elwyn G, Edwards A. Knowledge is not power for patients: a systematic  
7 586 review and thematic synthesis of patient-reported barriers and facilitators to shared decision making.  
8 587 *Patient Educ Couns.* 2014;94(3):291-309.
- 9 588 45. Richards CA, Starks H, O'Connor MR, Bourget E, Hays RM, Doorenbos AZ. Physicians  
10 589 Perceptions of Shared Decision-Making in Neonatal and Pediatric Critical Care. *Am J Hosp Palliat Care.*  
11 590 2018;35(4):669-76.
- 12 591 46. Wilcox ME, Ely EW. Challenges in conducting long-term outcomes studies in critical care. *Curr*  
13 592 *Opin Crit Care.* 2019;25(5):473-88.
- 14 593 47. Geense W, Zegers M, Vermeulen H, van den Boogaard M, van der Hoeven J. MONITOR-IC  
15 594 study, a mixed methods prospective multicentre controlled cohort study assessing 5-year outcomes of  
16 595 ICU survivors and related healthcare costs: a study protocol. *BMJ Open.* 2017;7(11):e018006.
- 17 596 48. Fidler V, Nap R, Miranda DR. The effect of a managerial-based intervention on the occurrence  
18 597 of out-of-range-measurements and mortality in intensive care units. *J Crit Care.* 2004;19(3):130-4.
- 19 598 49. Rivera-Fernández R, Nap R, Vázquez-Mata G, Reis Miranda D. Analysis of physiologic  
20 599 alterations in intensive care unit patients and their relationship with mortality. *J Crit Care.*  
21 600 2007;22(2):120-8.
- 22 601 50. House S, Havens D. Nurses' and Physicians' Perceptions of Nurse-Physician Collaboration: A  
23 602 Systematic Review. *J Nurs Adm.* 2017;47(3):165-71.
- 24 603 51. Pecanac KE, Schwarze ML. Conflict in the intensive care unit: Nursing advocacy and surgical  
25 604 agency. *Nurs Ethics.* 2018;25(1):69-79.
- 26 605 52. Studdert DM, Mello MM, Burns JP, Puopolo AL, Galper BZ, Truog RD, et al. Conflict in the care  
27 606 of patients with prolonged stay in the ICU: types, sources, and predictors. *Intensive Care Med.*  
28 607 2003;29(9):1489-97.
- 29 608 53. Edwards MP, Thronson K, Dyck F. Critical care nurses' perceptions of their roles in family-  
30 609 team conflicts related to treatment plans. *Can J Nurs Res.* 2012;44(1):61-75.
- 31 610 54. Bakker AB, Le Blanc PM, Schaufeli WB. Burnout contagion among intensive care nurses. *J Adv*  
32 611 *Nurs.* 2005;51(3):276-87.
- 33 612 55. Weidema FC, Molewijk BA, Kamsteeg F, Widdershoven GA. Aims and harvest of moral case  
34 613 deliberation. *Nurs Ethics.* 2013;20(6):617-31.
- 35 614 56. Adams A, Mannix T, Harrington A. Nurses' communication with families in the intensive care  
36 615 unit - a literature review. *Nurs Crit Care.* 2017;22(2):70-80.
- 37 616 57. Puntillo KA, McAdam JL. Communication between physicians and nurses as a target for  
38 617 improving end-of-life care in the intensive care unit: challenges and opportunities for moving forward.  
39 618 *Crit Care Med.* 2006;34(11 Suppl):S332-40.
- 40 619 58. Azoulay E, Timsit JF, Sprung CL, Soares M, Rusinová K, Lafabrie A, et al. Prevalence and factors  
41 620 of intensive care unit conflicts: the conflictus study. *Am J Respir Crit Care Med.* 2009;180(9):853-60.
- 42 621 59. Le Blanc PM, Schaufeli WB, Salanova M, Llorens S, Nap RE. Efficacy beliefs predict collaborative  
43 622 practice among intensive care unit nurses. *J Adv Nurs.* 2010;66(3):583-94.
- 44 623 60. Centofanti JE, Duan EH, Hoad NC, Swinton ME, Perri D, Waugh L, et al. Use of a daily goals  
45 624 checklist for morning ICU rounds: a mixed-methods study. *Crit Care Med.* 2014;42(8):1797-803.
- 46 625 61. Pronovost P, Berenholtz S, Dorman T, Lipsett PA, Simmonds T, Haraden C. Improving  
47 626 communication in the ICU using daily goals. *J Crit Care.* 2003;18(2):71-5.
- 48 627 62. van Beusekom I, Bakhshi-Raiez F, de Keizer NF, van der Schaaf M, Termorshuizen F,  
49 628 Dongelmans DA. Dutch ICU survivors have more consultations with general practitioners before and  
50 629 after ICU admission compared to a matched control group from the general population. *PLoS One.*  
51 630 2019;14(5):e0217225.
- 52 631 63. Scholl I, LaRussa A, Hahlweg P, Kobrin S, Elwyn G. Organizational- and system-level  
53 632 characteristics that influence implementation of shared decision-making and strategies to address  
54 633 them - a scoping review. *Implement Sci.* 2018;13(1):40.



- 1  
2  
3 634 64. Giuliani E, Melegari G, Carrieri F, Barbieri A. Overview of the main challenges in shared decision  
4 635 making in a multicultural and diverse society in the intensive and critical care setting. J Eval Clin Pract.  
5 636 2020;26(2):520-3.  
6 637 65. Guest G, Bunce A, Johnson L. How Many Interviews Are Enough?:An Experiment with Data  
7 638 Saturation and Variability. Field Methods. 2006;18(1):59-82.  
8  
9 639

10 640

11 641

12 642

13 643

14 644

15 646

16 647

17 648

18 649

19 650

20 651

21 652

22 653

23 654

24 655

25 656

26 657

27 658

28 659

29 660

30 661

31

32

33

34

35

36

37

For peer review only



1  
2  
3  
4  
5  
6  
7  
8  
9  
10  
11  
12  
13  
14  
15  
16  
17  
18  
19  
20  
21  
22  
23  
24  
25  
26  
27  
28  
29  
30  
31  
32  
33  
34  
35  
36  
37  
38  
39  
40  
41  
42  
43  
44  
45  
46  
47  
48  
49  
50  
51  
52  
53  
54  
55  
56  
57  
58  
59  
60



Figure 1. ICU physicians mainly spoke of struggles with implementing SDM in the ICU, while patients and families elaborated on their needs, and ICU nurses talked about how their current role in the ICU decision-making process could be improved.

38x26mm (300 x 300 DPI)

1 **Supplementary Materials**2 *Supplementary material 1: COREQ Checklist*

| Topic                                          | Item No. | Guide Questions/Description                                                                                                                              | Reported on Page No. |
|------------------------------------------------|----------|----------------------------------------------------------------------------------------------------------------------------------------------------------|----------------------|
| <b>Domain 1: Research team and reflexivity</b> |          |                                                                                                                                                          |                      |
| <i>Personal characteristics</i>                |          |                                                                                                                                                          |                      |
| Interviewer/facilitator                        | 1        | Which author/s conducted the interview or focus group?                                                                                                   | 5                    |
| Credentials                                    | 2        | What were the researcher's credentials? E.g. PhD, MD                                                                                                     | 1                    |
| Occupation                                     | 3        | What was their occupation at the time of the study?                                                                                                      | 1                    |
| Gender                                         | 4        | Was the researcher male or female?                                                                                                                       | 1                    |
| Experience and training                        | 5        | What experience or training did the researcher have?                                                                                                     | 5                    |
| <i>Relationship with participants</i>          |          |                                                                                                                                                          |                      |
| Relationship established                       | 6        | Was a relationship established prior to study commencement?                                                                                              | 6                    |
| Participant knowledge of the interviewer       | 7        | What did the participants know about the researcher? e.g. personal goals, reasons for doing the research                                                 | 6                    |
| Interviewer characteristics                    | 8        | What characteristics were reported about the interviewer/facilitator? e.g. Bias, assumptions, reasons and interests in the research topic                | 6                    |
| <b>Domain 2: Study design</b>                  |          |                                                                                                                                                          |                      |
| <i>Theoretical framework</i>                   |          |                                                                                                                                                          |                      |
| Methodological orientation and Theory          | 9        | What methodological orientation was stated to underpin the study? e.g. grounded theory, discourse analysis, ethnography, phenomenology, content analysis | 6                    |
| <i>Participant selection</i>                   |          |                                                                                                                                                          |                      |
| Sampling                                       | 10       | How were participants selected? e.g. purposive, convenience, consecutive, snowball                                                                       | 5                    |
| Method of approach                             | 11       | How were participants approached? e.g. face-to-face, telephone, mail, email                                                                              | 5                    |
| Sample size                                    | 12       | How many participants were in the study?                                                                                                                 | 7                    |
| Non-participation                              | 13       | How many people refused to participate or dropped out? Reasons?                                                                                          | 7                    |
| <i>Setting</i>                                 |          |                                                                                                                                                          |                      |
| Setting of data collection                     | 14       | Where was the data collected? e.g. home, clinic, workplace                                                                                               | 5                    |
| Presence of non-participants                   | 15       | Was anyone else present besides the participants and researchers?                                                                                        | 5                    |
| Description of sample                          | 16       | What are the important characteristics of the sample? e.g. demographic data, date                                                                        | 7                    |
| <i>Data collection</i>                         |          |                                                                                                                                                          |                      |
| Interview guide                                | 17       | Were questions, prompts, guides provided by the authors? Was it pilot tested?                                                                            | 6                    |
| Repeat interviews                              | 18       | Were repeat interviews carried out? If yes, how many?                                                                                                    | NA                   |
| Audio/visual recording                         | 19       | Did the research use audio or visual recording to collect the data?                                                                                      | 6                    |
| Field notes                                    | 20       | Were field notes made during and/or after the interview or focus group?                                                                                  | 6                    |

|                                        |    |                                                                                                                                 |      |
|----------------------------------------|----|---------------------------------------------------------------------------------------------------------------------------------|------|
| Duration                               | 21 | What was the duration of the inter views or focus group?                                                                        | 7    |
| Data saturation                        | 22 | Was data saturation discussed?                                                                                                  | 6    |
| Transcripts returned                   | 23 | Were transcripts returned to participants for comment and/or correction?                                                        | 6    |
| <b>Domain 3: analysis and findings</b> |    |                                                                                                                                 |      |
| <i>Data analysis</i>                   |    |                                                                                                                                 |      |
| Number of data coders                  | 24 | How many data coders coded the data?                                                                                            | 6    |
| Description of the coding tree         | 25 | Did authors provide a description of the coding tree?                                                                           | -    |
| Derivation of themes                   | 26 | Were themes identified in advance or derived from the data?                                                                     | 6    |
| Software                               | 27 | What software, if applicable, was used to manage the data?                                                                      | 6    |
| Participant checking                   | 28 | Did participants provide feedback on the findings?                                                                              | 6    |
| <i>Reporting</i>                       |    |                                                                                                                                 |      |
| Quotations presented                   | 29 | Were participant quotations presented to illustrate the themes/findings? Was each quotation identified? e.g. participant number | 8-17 |
| Data and findings consistent           | 30 | Was there consistency between the data presented and the findings?                                                              | 8-17 |
| Clarity of major themes                | 31 | Were major themes clearly presented in the findings?                                                                            | 8-17 |
| Clarity of minor themes                | 32 | Is there a description of diverse cases or discussion of minor themes?                                                          | 8-17 |

Developed from: Tong A, Sainsbury P, Craig J. Consolidated criteria for reporting qualitative research (COREQ): a 32-item checklist for interviews and focus groups. *International Journal for Quality in Health Care*. 2007. Volume 19, Number 6: pp. 349 – 357

19 *Supplementary material 2: Preliminary data collection used to develop Topic guide.*

20 *Table 1. Preliminary data inventory used to develop Topic guide. Data was collected at the ICU patient*  
 21 *organization symposium, following the authors' presentation about SDM in the ICU. The audience, consisting of*  
 22 *ICU physicians, ICU nurses, and former patients and their family members, were asked to write down their views*  
 23 *on what was needed and what they saw as barriers to implementing SDM in the ICU. Notes were received from*  
 24 *54 individuals. The information was categorized in six topics. Some factors were mentioned multiple times.*

| <b>Category</b>                                      | <b>Quotes</b>                                                                                                                                                                                                                                                                                                                                                                                                                                                                                                                                                                                                                                                                                                                                                                                                                                                                                                                                                                                             |
|------------------------------------------------------|-----------------------------------------------------------------------------------------------------------------------------------------------------------------------------------------------------------------------------------------------------------------------------------------------------------------------------------------------------------------------------------------------------------------------------------------------------------------------------------------------------------------------------------------------------------------------------------------------------------------------------------------------------------------------------------------------------------------------------------------------------------------------------------------------------------------------------------------------------------------------------------------------------------------------------------------------------------------------------------------------------------|
| <b>Time</b>                                          | <p>'Often there is a lack of time in acute settings' to properly talk, listen and explain. This is necessary to really talk though the consequences of certain choices.'</p> <p>'No time to sit with patients or surrogates before treatment starts'</p> <p>'As a clinician I expect there to be space for conversation regardless of the point in time'</p>                                                                                                                                                                                                                                                                                                                                                                                                                                                                                                                                                                                                                                              |
| <b>Factors pertaining to Patients and surrogates</b> | <p>'More human, less patient'</p> <p>'How did the patient function before admission?'</p> <p>'What do the patient and family want? How far do they want to go?'</p> <p>'But what if the patient is sedated?! Permission needed to share decision-making in their place.'</p> <p>'Jump from ICU to home is large. Care is taken care of by GP, but they aren't specialists..'</p> <p>'Don't just monitor the patients' QoL, but the entire family's!'</p> <p>'In order to share decision-making you need access to the medical dossier and visit patient whenever.'</p> <p>'Being involved in assessment emotions and mental health symptoms of patients'</p> <p>'Being allowed to share care to a degree.'</p> <p>'Direction: it happens to you, but you can't steer. You're dependent on everything.'</p> <p>'Trust, equality, being taken seriously.'</p> <p>'Surrogates' knowledge about what the patient truly wants.'</p> <p>'Talk through resuscitation preference.'</p>                            |
| <b>Factors pertaining to clinicians</b>              | <p>'A multidisciplinary meeting with different medical specialists about recovery possibilities.'</p> <p>'Explain where possible before admission. When admission is planned, in the outpatient clinic.'</p> <p>'Talk about a possible ICU admission with the GP before it happens.'</p> <p>'Talk about treatment limitations before ICU admission'</p> <p>'Physician who dares to discuss difficult topics'</p> <p>'Nurses can talk through things with patients and families beforehand, as a bridge toward the physician. Physicians have to be open to this information'</p> <p>'More information about who the patient is as a human being before they were admitted'</p> <p>'When a patient is transferred, this is about more than just medical facets. Also: rehabilitation, GP, etc.'</p> <p>'Trust that we act in the patient's best interests.'</p> <p>'Ethical or moral deliberation in the ICU.'</p> <p>'Passionate clinicians who value SDM.'</p> <p>'As a topic to nurses' education.'</p> |

|                               |                                                                                                                                                                                                                                                                                                                                                                                                                                                                                                                                                                                                                                                                                                                                                                                                                                                                                           |
|-------------------------------|-------------------------------------------------------------------------------------------------------------------------------------------------------------------------------------------------------------------------------------------------------------------------------------------------------------------------------------------------------------------------------------------------------------------------------------------------------------------------------------------------------------------------------------------------------------------------------------------------------------------------------------------------------------------------------------------------------------------------------------------------------------------------------------------------------------------------------------------------------------------------------------------|
|                               | <p>'Keep remembering that as a physician you should not put the responsibility at the family members' feet'</p> <p>'Clinician expects: don't force it.'</p>                                                                                                                                                                                                                                                                                                                                                                                                                                                                                                                                                                                                                                                                                                                               |
| <b>Organizational factors</b> | <p>'More attention for Post-ICU Syndrome in all facets of the organization.'</p> <p>'One person as the main communicator, or communication and information coach'</p> <p>'A truly multidisciplinary conference: social, psychological and medical. Maybe even with family members.'</p> <p>'Clear, shared vision about SDM in entire team.'</p> <p>'Acknowledge the importance of SDM.'</p> <p>'Knowledge within treatment team about communication to and between patients and family members.'</p> <p>'Practical tips, courses and education'.</p>                                                                                                                                                                                                                                                                                                                                      |
| <b>Information</b>            | <p>'Patients and family members need good information about prognosis and treatment possibilities to decide. Also: how can you provide personalized information, while keeping cultural background, health skills, etc. in mind'</p> <p>'Clarity about the consequences of some choices, what are the consequences of not treating, what will and won't you choose'</p> <p>'Clear explanations about the current situation'</p> <p>'Long-term data.'</p> <p>'Use social workers.'</p> <p>'Information in the outpatient clinic.'</p> <p>'Information about wishes, expectations, pre-existent functioning – this only comes up later in the treatment trajectory instead of at the start'</p> <p>'Patients and family members need a prognosis to examine whether treatment is in line with wishes and expectations for QoL'</p> <p>'Explanation: what does an ICU-admission entail?'</p> |
| <b>Miscellaneous</b>          | <p>'Not going to the ICU does not always equal stopping treatment. Palliative sedation is treatment too.'</p> <p>'Not resuscitating does not mean there is no treatment happening.'</p>                                                                                                                                                                                                                                                                                                                                                                                                                                                                                                                                                                                                                                                                                                   |

25

26

27

28

29

30

31

32

33

34

35

36

37

1  
2  
3 38 *Supplementary material 3: Clinician Topic Guide*  
4

5 39 - Can you describe the current process of ICU-admission and treatment? What is your role in this process? Can  
6  
7 40 you name an example of your experiences with these processes?

8  
9 41 - How do you experience the degree of involvement of ICU nurses in the ICU decision-making process? Can you  
10  
11 42 name an example of your possible experiences with involving the ICU nurse in the ICU decision-making process?

12  
13 43 Should the ICU nurse have a bigger role in the ICU decision process? Why?

14  
15 44 - How does the multidisciplinary meeting contribute to the ICU decision-making process? Can its current role be  
16  
17 45 improved upon?

18  
19 46 - How do you experience the degree of involvement of patients and family members in the ICU decision-making  
20  
21 47 process? Should they be involved more? What would the advantages and disadvantages of involving them more

22  
23 48 be? What is needed in order to involve them more? What information is important and needed to allow patients  
24  
25 49 and their family members to share in the decision-making process?

26  
27 50

28  
29 51

30  
31 52

32  
33 53

34  
35 54

36  
37 55

38  
39 56

40  
41 57

42  
43 58

44  
45 59

46  
47 60

48  
49 61

50  
51 62

52  
53 63

54  
55 64

56  
57 65

58  
59 66

60

1  
2  
3 67 *Supplementary material 4: Former patient and family member Topic Guide*  
4

5 68 - Why were you admitted to the ICU? Can you describe the period of admission for me?  
6

7 69 - How were decisions regarding ICU admission made? Who was consulted? Were you involved in these decisions?  
8

9 70 Can you give me an example of your experiences regarding admission decision making?  
10

11 71 - How were decisions regarding ICU treatment made? Who was consulted? Were you involved in these decisions?  
12

13 72 Can you give me an example of your experiences regarding admission decision making?  
14

15 73 - What information do you think is of importance when talking about ICU admission and treatment decision  
16

17 74 making?  
18

19 75 - Would you or your family member have liked to be more involved in the ICU decision process? If yes, how?  
20

21 76 What would you have needed to achieve this? If no, why not?  
22

23 77  
24

25 78  
26

27 79  
28

29 80  
30

31 81  
32

33 82  
34

35 83  
36

37 84  
38

39 85  
40

41 86  
42  
43  
44  
45  
46  
47  
48  
49  
50  
51  
52  
53  
54  
55  
56  
57  
58  
59  
60

## COREQ (CONsolidated criteria for REporting Qualitative research) Checklist

A checklist of items that should be included in reports of qualitative research. You must report the page number in your manuscript where you consider each of the items listed in this checklist. If you have not included this information, either revise your manuscript accordingly before submitting or note N/A.

| Topic                                          | Item No. | Guide Questions/Description                                                                                                                              | Reported on Page No. |
|------------------------------------------------|----------|----------------------------------------------------------------------------------------------------------------------------------------------------------|----------------------|
| <b>Domain 1: Research team and reflexivity</b> |          |                                                                                                                                                          |                      |
| <i>Personal characteristics</i>                |          |                                                                                                                                                          |                      |
| Interviewer/facilitator                        | 1        | Which author/s conducted the interview or focus group?                                                                                                   |                      |
| Credentials                                    | 2        | What were the researcher's credentials? E.g. PhD, MD                                                                                                     |                      |
| Occupation                                     | 3        | What was their occupation at the time of the study?                                                                                                      |                      |
| Gender                                         | 4        | Was the researcher male or female?                                                                                                                       |                      |
| Experience and training                        | 5        | What experience or training did the researcher have?                                                                                                     |                      |
| <i>Relationship with participants</i>          |          |                                                                                                                                                          |                      |
| Relationship established                       | 6        | Was a relationship established prior to study commencement?                                                                                              |                      |
| Participant knowledge of the interviewer       | 7        | What did the participants know about the researcher? e.g. personal goals, reasons for doing the research                                                 |                      |
| Interviewer characteristics                    | 8        | What characteristics were reported about the interviewer/facilitator? e.g. Bias, assumptions, reasons and interests in the research topic                |                      |
| <b>Domain 2: Study design</b>                  |          |                                                                                                                                                          |                      |
| <i>Theoretical framework</i>                   |          |                                                                                                                                                          |                      |
| Methodological orientation and Theory          | 9        | What methodological orientation was stated to underpin the study? e.g. grounded theory, discourse analysis, ethnography, phenomenology, content analysis |                      |
| <i>Participant selection</i>                   |          |                                                                                                                                                          |                      |
| Sampling                                       | 10       | How were participants selected? e.g. purposive, convenience, consecutive, snowball                                                                       |                      |
| Method of approach                             | 11       | How were participants approached? e.g. face-to-face, telephone, mail, email                                                                              |                      |
| Sample size                                    | 12       | How many participants were in the study?                                                                                                                 |                      |
| Non-participation                              | 13       | How many people refused to participate or dropped out? Reasons?                                                                                          |                      |
| <i>Setting</i>                                 |          |                                                                                                                                                          |                      |
| Setting of data collection                     | 14       | Where was the data collected? e.g. home, clinic, workplace                                                                                               |                      |
| Presence of non-participants                   | 15       | Was anyone else present besides the participants and researchers?                                                                                        |                      |
| Description of sample                          | 16       | What are the important characteristics of the sample? e.g. demographic data, date                                                                        |                      |
| <i>Data collection</i>                         |          |                                                                                                                                                          |                      |
| Interview guide                                | 17       | Were questions, prompts, guides provided by the authors? Was it pilot tested?                                                                            |                      |
| Repeat interviews                              | 18       | Were repeat interviews carried out? If yes, how many?                                                                                                    |                      |
| Audio/visual recording                         | 19       | Did the research use audio or visual recording to collect the data?                                                                                      |                      |
| Field notes                                    | 20       | Were field notes made during and/or after the interview or focus group?                                                                                  |                      |
| Duration                                       | 21       | What was the duration of the interviews or focus group?                                                                                                  |                      |
| Data saturation                                | 22       | Was data saturation discussed?                                                                                                                           |                      |
| Transcripts returned                           | 23       | Were transcripts returned to participants for comment and/or                                                                                             |                      |



| Topic                                  | Item No. | Guide Questions/Description                                                                                                        | Reported on Page No. |
|----------------------------------------|----------|------------------------------------------------------------------------------------------------------------------------------------|----------------------|
|                                        |          | correction?                                                                                                                        |                      |
| <b>Domain 3: analysis and findings</b> |          |                                                                                                                                    |                      |
| <i>Data analysis</i>                   |          |                                                                                                                                    |                      |
| Number of data coders                  | 24       | How many data coders coded the data?                                                                                               |                      |
| Description of the coding tree         | 25       | Did authors provide a description of the coding tree?                                                                              |                      |
| Derivation of themes                   | 26       | Were themes identified in advance or derived from the data?                                                                        |                      |
| Software                               | 27       | What software, if applicable, was used to manage the data?                                                                         |                      |
| Participant checking                   | 28       | Did participants provide feedback on the findings?                                                                                 |                      |
| <i>Reporting</i>                       |          |                                                                                                                                    |                      |
| Quotations presented                   | 29       | Were participant quotations presented to illustrate the themes/findings?<br>Was each quotation identified? e.g. participant number |                      |
| Data and findings consistent           | 30       | Was there consistency between the data presented and the findings?                                                                 |                      |
| Clarity of major themes                | 31       | Were major themes clearly presented in the findings?                                                                               |                      |
| Clarity of minor themes                | 32       | Is there a description of diverse cases or discussion of minor themes?                                                             |                      |

Developed from: Tong A, Sainsbury P, Craig J. Consolidated criteria for reporting qualitative research (COREQ): a 32-item checklist for interviews and focus groups. *International Journal for Quality in Health Care*. 2007. Volume 19, Number 6: pp. 349 – 357

**Once you have completed this checklist, please save a copy and upload it as part of your submission. DO NOT include this checklist as part of the main manuscript document. It must be uploaded as a separate file.**
